# Supplementary material
Source: PubMed Central journal article supplement (PMC6582260)
Supplement: jama-321-2292-s004.pdf [file jama-321-2292-s004.pdf]

## Supplementary Online Content

Writing Committee for the PROBESE Collaborative Group of the PROtective VEntilation Network (PROVENet) for the Clinical Trial Network of the European Society of Anaesthesiology. Effect of intraoperative high positive end-expiratory pressure (PEEP) with recruitment maneuvers vs low PEEP on postoperative pulmonary complications in obese patients: a randomized clinical trial. *JAMA*. doi:10.1001/jama.2019.7505

### **Lists of committees, investigators, and study sites**

#### **eMethods**

**eTable 1.** The Assess Respiratory Risk in Surgical Patients in Catalonia (ARISCAT) score

**eTable 2.** Rescue strategies for intraoperative hypoxemia

**eTable 3.** Types of intraoperative IV fluids

**eTable 4.** Types of intraoperative vasoactive drugs

**eTable 5.** Types of anesthetic, muscle paralyzing and reversal agents

**eTable 6.** Further characteristics of surgery

**eTable 7.** Assessment of postoperative pain and dyspnea

**eTable 8.** Per-protocol analysis

**eTable 9.** Sensitivity analysis for the primary outcome

**eFigure 1.** Effect size (Z) according to the enrollment of patients in the trial

**eFigure 2.** Tidal volume during anesthesia

**eFigure 3.** Positive end-expiratory pressure during anesthesia

**eFigure 4.** Peak pressure during anesthesia

**eFigure 5.** Peripheral oxyhemoglobin saturation during anesthesia

**eFigure 6.** Driving pressure during anesthesia

**eFigure 7.** Fraction of inspiratory oxygen during anesthesia

**eFigure 8.** Probability of postoperative pulmonary complications in the first 5 postoperative days

**eFigure 9.** Probability of severe postoperative pulmonary complications in the first 5 postoperative days

**eFigure 10.** Probability of postoperative extra-pulmonary complications in the first 5 postoperative days

**eFigure 11.** Probability of death in the first 5 postoperative days

**eFigure 12.** Results of the sensitivity analysis for the primary endpoint

#### **eReferences**

This supplementary material has been provided by the authors to give readers additional information about their work.

## Lists of committees, investigators and study sites

### 1.1 Writing committee members

The writing committee was composed by Thomas Bluth (Pulmonary Engineering Group, Department of Anesthesiology and Intensive Care, University Hospital Carl Gustav Carus, Technische Universität Dresden, Dresden, Germany), Ary Serpa Neto (Department of Critical Care Medicine, Hospital Israelita Albert Einstein, Sao Paulo, Brazil), Marcus J. Schultz (Department of Intensive Care, Academic Medical Center, University of Amsterdam, The Netherlands), Paolo Pelosi (Department of Surgical Sciences and Integrated Diagnostics, University of Genoa, Policlinico San Martino, Genoa, Italy) and Marcelo Gama de Abreu (Pulmonary Engineering Group, Department of Anesthesiology and Intensive Care, University Hospital Carl Gustav Carus, Technische Universität Dresden, Dresden, Germany). All members of the writing committee contributed equally.

### 1.2 Steering committee members

*(names are listed in alphabetical order)*

|                        |                                                                                                                                                              |
|------------------------|--------------------------------------------------------------------------------------------------------------------------------------------------------------|
| Bluth, Thomas          | Department of Anesthesiology and Intensive Care, Pulmonary Engineering Group, University Hospital Carl Gustav Carus, Technische Universität Dresden, Germany |
| Bobek, Ilona           | Aneszteziológiai és Intenzív Terápiás Klinika, Semmelweis Egyetem, Hungary                                                                                   |
| Canet, Jaume           | University Hospital Germans Trias i Pujol, ICS, UAB, Spain                                                                                                   |
| Cinnella, Gilda        | Department of Anesthesiology and Intensive Care Medicine, University of Foggia, Italy                                                                        |
| de Baerdemaeker, Luc   | Ghent University Hospital, Ghent, Belgium. Corneel Heymanslaan 10, 9000 Gent, Belgium                                                                        |
| Gama de Abreu, Marcelo | Department of Anesthesiology and Intensive Care, Pulmonary Engineering Group, University Hospital Carl Gustav Carus, Technische Universität Dresden, Germany |
| Gregoretto, Cesare     | Department of Anesthesiology, Città della Salute e della Scienza, Turin, Italy                                                                               |
| Hedenstierna, Göran    | Department of Medical Sciences, Section of Clinical Physiology, University Hospital, Uppsala, Sweden                                                         |
| Hemmes, Sabine         | Amsterdam UMC, University of Amsterdam, Department of Anesthesiology, Meibergdreef 9, Amsterdam, The Netherlands                                             |
| Hiesmayr, Michael      | Division Cardiac, Thoracic, Vascular Anesthesia and Intensive Care, Medical University, Vienna, Austria                                                      |
| Hollmann, Markus W.    | Amsterdam UMC, University of Amsterdam, Department of Anesthesiology, Meibergdreef 9, Amsterdam, The Netherlands                                             |
| Jaber, Samir           | Department of Critical Care Medicine and Anesthesiology (SAR B), Saint Eloi University Hospital, Montpellier, France                                         |
| Laffey, John           | Department of Anesthesiology, St. Michael's Hospital, University of Toronto, Toronto, ON, Canada                                                             |
| Licker, Marc-Joseph    | Hôpitaux Universitaires de Genève, Département APSI, service d'anesthésiologie; Faculty of Medicine, University of Geneva, Switzerland                       |

|                     |                                                                                                                                                                                                                                          |
|---------------------|------------------------------------------------------------------------------------------------------------------------------------------------------------------------------------------------------------------------------------------|
| Markstaller, Klaus  | Department of Anaesthesia, Critical Care and Pain Medicine, Medical University Vienna, Austria                                                                                                                                           |
| Matot, Idit         | Division of Anesthesia, Pain and Critical Care, Tel-Aviv Medical Center affiliated with Sackler Medical School, Tel Aviv University, Tel Aviv, Israel                                                                                    |
| Mills, Gary H       | Operating Services, Critical Care and Anaesthesia (OSCCA), Sheffield Teaching Hospitals and University of Sheffield, United Kingdom                                                                                                      |
| Mulier, Jan Paul    | Department of Anesthesiology, AZ Sint Jan Brugge-Oostende AV, Belgium                                                                                                                                                                    |
| Pelosi, Paolo       | Dipartimento di Scienze Chirurgiche e Diagnostiche Integrate – DISC – Università degli Studi di Genova – Genova – Italy and Anestesia e Terapia Intensiva - IRCCS Policlinico San Martino – Genova – Italy                               |
| Putensen, Christian | Department of Anaesthesiology and Intensive Care Medicine, University Hospital of Bonn, Bonn, Germany                                                                                                                                    |
| Rossaint, Rolf      | Department of Anesthesiology, Medical Faculty, RWTH Aachen University, Aachen, Germany                                                                                                                                                   |
| Schmitt, Jochen     | Center for Evidence-based Healthcare, University Hospital Dresden, Germany                                                                                                                                                               |
| Schultz, Marcus J.  | Amsterdam UMC, University of Amsterdam, Department of Anesthesiology, Meibergdreef 9, Amsterdam, The Netherlands                                                                                                                         |
| Senturk, Mert       | Istanbul University, Istanbul Faculty of Medicine, Turkey                                                                                                                                                                                |
| Serpa Neto, Ary     | Department of Critical Care Medicine, Hospital Israelita Albert Einstein, Sao Paulo, Brazil                                                                                                                                              |
| Severgnini, Paolo   | Università' della'insubria – Dipartimento di Anestesia - Azienda Ospedaliera asst Settelaghi Ospedale di Circolo e Fondazione Macchii – 21100 Varese - Italy                                                                             |
| Sprung, Juraj       | Department of Anesthesiology and Perioperative Medicine, Mayo Clinic, Rochester, Minnesota, USA                                                                                                                                          |
| Vidal Melo, Marcos  | Department of Anesthesia, Critical Care and Pain Medicine, Massachusetts General Hospital, Boston, Massachusetts, USA                                                                                                                    |
| Wrigge, Hermann     | Department of Anaesthesiology and Intensive Care Medicine, University of Leipzig, Leipzig, Germany and Department of Anaesthesiology, Intensive Care and Emergency Medicine, Pain Therapy; Bergmannstrost Hospital Halle, Halle, Germany |

### 1.3 Statistician

Ary Serpa Neto (Department of Critical Care Medicine, Hospital Israelita Albert Einstein, Sao Paulo, Brazil).

### 1.4 Data safety and monitoring committee

Patient data and safety was monitored by a committee, which was composed of a chairperson (Daniel Sessler) and four further members (Jennifer Hunter, Jeanine Wiener-Kronish, Jean-Louis Vincent and Andreas Hoefl). All adverse events (AEs) were entered into the electronic clinical report form within pre-specified time frames, including severe AEs and suspected unexpected severe adverse events, were monitored by an international AE-manager (Ary Serpa Neto), who provided the data and safety monitoring committee with reports for review. The

committee further monitored the overall status of the trial, e.g. progress of patient enrollment, general adherence to protocol and completeness of data entry.

## 1.5 PROBESE investigators

(\*, indicates local principal investigators; names are listed in alphabetical order)

|                               |                                                                                                                                                                                                                         |
|-------------------------------|-------------------------------------------------------------------------------------------------------------------------------------------------------------------------------------------------------------------------|
| Abelha, Fernando*             | Centro Hospitalar de São João, Department of Anaesthesiology, Porto, Portugal and Department of Surgery and Physiology, Cardiovascular Research Center, Faculty of Medicine of the University of Porto, Porto, Portugal |
| Abitağaoğlu, Sühayla          | Fatih Sultan Mehmet Educational and Research Hospital, İstanbul, Turkey                                                                                                                                                 |
| Achilles, Marc*               | Marienhospital Wesel, Wesel, Germany                                                                                                                                                                                    |
| Adebesin, Afeez               | Imperial College Healthcare NHS Trust, UK                                                                                                                                                                               |
| Adriaensens, Ine              | University Hospital Antwerp, Belgium                                                                                                                                                                                    |
| Ahene, Charles*               | Cleveland Clinic Abu Dhabi, Al Maryah Island, Abu Dhabi, UAE                                                                                                                                                            |
| Akbar, Fatima                 | Imperial College Healthcare NHS Trust, UK                                                                                                                                                                               |
| Al Harbi, Mohammed            | Ministry of National Guard Health Affairs, King Abdulaziz Medical City – Riyadh, Anesthesia Department and King Saud Bin Abdulaziz University for Health science, Saudi Arabia                                          |
| Al Khoury al Kallab, Rita     | Hôpitaux Universitaires de Genève, Département APSI, service d'anesthésiologie, Switzerland                                                                                                                             |
| Albanel, Xavier               | Hôpitaux Universitaires de Genève, Département APSI, service d'anesthésiologie, Switzerland                                                                                                                             |
| Aldenkortt, Florence          | Hôpitaux Universitaires de Genève, Département APSI, service d'anesthésiologie, Switzerland                                                                                                                             |
| Alfouzan, Rawan               | Ministry of National Guard Health Affairs, King Abdulaziz Medical City – Riyadh, Anesthesia Department, Saudi Arabia                                                                                                    |
| Abdullah Saleh                | Ministry of National Guard Health Affairs, King Abdulaziz Medical City – Riyadh, Anesthesia Department, Saudi Arabia                                                                                                    |
| Alruqaie, Reef                | Ministry of National Guard Health Affairs, King Abdulaziz Medical City – Riyadh, Anesthesia Department, Saudi Arabia                                                                                                    |
| Altermatt, Fernando*          | Department of Anesthesiology. School of Medicine. Pontificia Universidad Catolica de Chile                                                                                                                              |
| Araujo, Bruno Luís de Castro* | Department of Anesthesiology, Hospital do Câncer II, National Cancer Institute of Brazil (INCA), Rio de Janeiro, Brazil                                                                                                 |
| Arbesú, Genaro                | University Hospital Germans Trias i Pujol, ICS, UAB, Spain                                                                                                                                                              |
| Artsi, Hanna                  | Division of Anesthesia, Pain and Critical Care, Tel-Aviv Medical Center affiliated with Sackler Medical School, Tel Aviv University, Tel Aviv, Israel                                                                   |
| Aurilio, Caterina*            | Department of Women, child and General and Specialized Surgery. University of Campania "L. Vanvitelli", Italy.                                                                                                          |
| Ayanoglu, Omer Hilmi          | Marmara University Pendik Training and Research Hospital, Turkey                                                                                                                                                        |
| Bacuzzi, Alessandro           | Universita' dell'Insubria – Dipartimento di Anestesia - Azienda Ospedaliera Asst Settlaghi Ospedale di Circolo e Fondazione Macchi – 21100 Varese - Italy                                                               |
| Baig, Harris*                 | University of Mississippi Medical Center, MS, USA                                                                                                                                                                       |
| Baird, Yolanda                | St Richard's Hospital, Chichester, UK                                                                                                                                                                                   |
| Balonov, Konstantin*          | Department of Anesthesiology and Perioperative Medicine, Tufts Medical Center, Boston, MA, USA                                                                                                                          |

|                            |                                                                                                                                                                                                   |
|----------------------------|---------------------------------------------------------------------------------------------------------------------------------------------------------------------------------------------------|
| Balust, Jaume              | Department of Anaesthesiology, Hospital Clínic, Barcelona, Spain.                                                                                                                                 |
| Banks, Samantha            | Royal Cornwall Hospital NHS Trust, UK                                                                                                                                                             |
| Bao, Xiaodong              | Department of Anesthesia, Critical Care and Pain Medicine, Massachusetts General Hospital, Boston, Massachusetts, USA                                                                             |
| Baumgartner, Mélanie       | Hôpitaux Universitaires de Genève, Département APSI, service d'anesthésiologie, Switzerland                                                                                                       |
| Belda Tortosa, Isabel*     | Hospital Sagrat Cor- Barcelona, Spain                                                                                                                                                             |
| Bergamaschi, Alice         | Department of Anesthesiology and Intensive Care, Pulmonary Engineering Group, University Hospital Carl Gustav Carus, Technische Universität Dresden, Germany                                      |
| Bergmann, Lars*            | Klinik für Anästhesiologie, Intensivmedizin und Schmerztherapie, Universitätsklinikum Knappschafts Krankenhaus Bochum, Bochum, Germany                                                            |
| Bigatello, Luca*           | St. Elizabeth's Medical Center, MA, USA                                                                                                                                                           |
| Biosca Pérez, Elena        | Consorcio Hospital General Universitario of Valencia, Spain                                                                                                                                       |
| Birr, Katja                | Department of Anesthesiology and Intensive Care, Pulmonary Engineering Group, University Hospital Carl Gustav Carus, Technische Universität Dresden, Germany                                      |
| Bluth, Thomas              | Department of Anesthesiology and Intensive Care, Pulmonary Engineering Group, University Hospital Carl Gustav Carus, Technische Universität Dresden, Germany                                      |
| Bojaxhi, Elird             | Department of Anesthesiology and Perioperative Medicine, Mayo Clinic Jacksonville, USA                                                                                                            |
| Bonenti, Chiara            | Universita' dell'Insubria – Dipartimento di Anestesia - Azienda Ospedaliera Asst Settlaghi Ospedale di Circolo e Fondazione Macchi – 21100 Varese - Italy                                         |
| Bonney, Iwona              | Department of Anesthesiology and Perioperative Medicine, Tufts Medical Center, Boston, MA, USA                                                                                                    |
| Bos, Elke M.E.             | Amsterdam UMC, University of Amsterdam, Department of Anesthesiology, Meibergdreef 9, Amsterdam, The Netherlands                                                                                  |
| Bowman, Sara               | Homerton University Hospitals NHS Foundation Trust, UK                                                                                                                                            |
| Braz, Leandro Gobbo        | Department of Anesthesiology, Universidade Estadual Paulista, Botucatu/SP, Brazil                                                                                                                 |
| Brugnoni, Elisa            | Universita' dell'Insubria – Dipartimento di Anestesia - Azienda Ospedaliera Asst Settlaghi Ospedale di Circolo e Fondazione Macchi – 21100 Varese - Italy                                         |
| Brunetti, Iole             | Anestesia e Terapia Intensiva - IRCCS Policlinico San Martino – Genova – Italy                                                                                                                    |
| Bruni, Andrea              | Anesthesia and Intensive Care, Department of Medical and Surgical Sciences, Magna Graeca University, Catanzaro, Italy                                                                             |
| Buenvenida, Shonie L.      | Department of Anesthesiology and Perioperative Medicine, Mayo Clinic, Rochester, Minnesota, USA                                                                                                   |
| Busch, Cornelius Johannes* | Department of Anesthesiology, Heidelberg University Hospital, Im Neuenheimer Feld 110, 69120 Heidelberg, Germany                                                                                  |
| Camerini, Giovanni         | Dipartimento di Scienze Chirurgiche e Diagnostiche Integrate – DISC – Università degli Studi di Genova – Genova – Italy and Clinica Chirurgica 1 - IRCCS Policlinico San Martino – Genova – Italy |
| Canet, Jaume*              | University Hospital Germans Trias i Pujol, ICS, UAB, Spain                                                                                                                                        |

|                              |                                                                                                                                                                                                                    |
|------------------------------|--------------------------------------------------------------------------------------------------------------------------------------------------------------------------------------------------------------------|
| Capatti, Beatrice            | Department Morphology, Surgery and Experimental Medicine. Anesthesia and intensive care university section. University of Ferrara. Italy                                                                           |
| Carmona, Javiera             | Department of Anesthesiology. School of Medicine. Pontificia Universidad Catolica de Chile                                                                                                                         |
| Carungcong, Jaime            | Magill Department of Anaesthesia, Chelsea & Westminster NHS Foundation Trust, 369 Fulham Road, London, SW10 9NH, UK                                                                                                |
| Carvalho, Marta              | Serviço de Anestesiologia, Centro Hospitalar do Porto, Porto, Portugal                                                                                                                                             |
| Cattan, Anat                 | Division of Anesthesia, Pain and Critical Care, Tel-Aviv Medical Center affiliated with Sackler Medical School, Tel Aviv University, Tel Aviv, Israel                                                              |
| Cavaleiro, Carla             | Serviço de Anestesiologia, Centro Hospitalar do Porto, Porto, Portugal and Centro de Investigação Clínica em Anestesiologia, Serviço de Anestesiologia, Centro Hospitalar do Porto, Porto, Portugal                |
| Chiumello, Davide*           | Dipartimento di Scienze della Salute, Università degli Studi di Milano, Milan, Italy and SC Anestesia e Rianimazione, ASST Santi Paolo e Carlo, Milan, Italy, Centro ricerca coordinata insufficienza respiratoria |
| Ciarlo, Stefano              | Department Morphology, Surgery and Experimental Medicine. Anesthesia and intensive care university section. University of Ferrara. Italy                                                                           |
| Coburn, Mark                 | Department of Anesthesiology, Medical Faculty, RWTH Aachen University, Aachen, Germany                                                                                                                             |
| Colella, Umberto             | Department of Women, child and General and Specialized Surgery. University of Campania "L. Vanvitelli", Italy.                                                                                                     |
| Contreras, Victor            | Department of Anesthesiology. School of Medicine. Pontificia Universidad Catolica de Chile                                                                                                                         |
| Corman Dincer, Pelin*        | Marmara University Pendik Training and Research Hospital, Turkey                                                                                                                                                   |
| Cotter, Elizabeth            | Section of Critical Care Medicine, Department of Anesthesia and Critical Care, University of Chicago, Chicago, IL, USA                                                                                             |
| Crovetto, Marcia             | Department of Anesthesiology. School of Medicine. Pontificia Universidad Catolica de Chile                                                                                                                         |
| Darrah, William              | Department of Anesthesiology, St. Michael's Hospital, University of Toronto, Toronto, ON, Canada                                                                                                                   |
| Davies, Simon*               | York Teaching Hospitals NHS Foundation Trust, UK                                                                                                                                                                   |
| de Baerdemaeker, Luc*        | Ghent University Hospital, Ghent, Belgium. Corneel Heymanslaan 10, 9000 Ghent, Belgium                                                                                                                             |
| De Hert, Stefan              | Ghent University Hospital, Ghent, Belgium. Corneel Heymanslaan 10, 9000 Ghent, Belgium                                                                                                                             |
| Del Cojo Peces, Enrique      | Área de Salud Don Benito-Villanueva/Don Benito-Villanueva Health Area, Spain.                                                                                                                                      |
| Delphin, Ellise              | Montefiore Medical Center, Bronx, NY 10467, USA                                                                                                                                                                    |
| Diaper, John                 | Hôpitaux Universitaires de Genève, Département APSI, service d'anesthésiologie, Switzerland                                                                                                                        |
| do Nascimento Junior, Paulo* | Department of Anesthesiology, Universidade Estadual Paulista, Botucatu/SP, Brazil                                                                                                                                  |
| Donatiello, Valerio          | Department of Women, child and General and Specialized Surgery. University of Campania "L. Vanvitelli", Italy.                                                                                                     |

|                                        |                                                                                                                                                                                                                    |
|----------------------------------------|--------------------------------------------------------------------------------------------------------------------------------------------------------------------------------------------------------------------|
| Dong, Jing                             | Department of Anesthesiology, Fudan University Shanghai Cancer Center, Shanghai, China. Department of Oncology, Shanghai Medical College, Fudan University, Shanghai, China                                        |
| Dourado, Maria do Socorro              | Associação Hospitalar Beneficente São Vicente de Paulo, Brazil                                                                                                                                                     |
| Dullenkopf, Alexander*<br>Ebner, Felix | Frauenfeld Cantonal Hospital, Switzerland<br>Klinik für Anästhesiologie, Intensivmedizin und Schmerztherapie, Universitätsklinikum Knappschaftskrankenhaus Bochum, Bochum, Germany                                 |
| Elgendy, Hamed*                        | Departments of Anesthesiology, King Abdullah Medical City, Makkah, Saudi Arabia and Assiut University, Egypt and Hamad Medical Corporation, Qatar.                                                                 |
| Ellenberger, Christoph                 | Hôpitaux Universitaires de Genève, Département APSI, service d'anesthésiologie, Switzerland                                                                                                                        |
| Erdoğan Ari, Dilek*                    | Fatih Sultan Mehmet Educational and Research Hospital, İstanbul, Turkey                                                                                                                                            |
| Ermert, Thomas                         | Department of Anesthesiology, Intensive Care and Pain Medicine, University Hospital Münster, Münster, Germany                                                                                                      |
| Farah, Fadi                            | St. Elizabeth's Medical Center, MA, USA                                                                                                                                                                            |
| Fernandez-Bustamante, Ana*             | University of Colorado School of Medicine, Department of Anesthesiology, CO, USA                                                                                                                                   |
| Ferreira, Cristina                     | Serviço de Anestesiologia, Centro Hospitalar do Porto, Porto, Portugal                                                                                                                                             |
| Fiore, Marco                           | Department of Women, child and General and Specialized Surgery. University of Campania "L. Vanvitelli", Italy.                                                                                                     |
| Fonte, Ana                             | Department of Anesthesiology from Centro Hospitalar de Entre o Douro e Vouga, EPE – São Sebastião Hospital, Santa Maria da Feira, Portugal                                                                         |
| Fortià Palahí, Christina               | Hospital Sagrat Cor- Barcelona, Spain                                                                                                                                                                              |
| Galimberti, Andrea                     | Dipartimento di Scienze della Salute, Università degli Studi di Milano, Milan, Italy and SC Anestesia e Rianimazione, Asst Santi Paolo e Carlo, Milan, Italy, Centro ricerca coordinata insufficienza respiratoria |
| Gama de Abreu, Marcelo*                | Department of Anesthesiology and Intensive Care, Pulmonary Engineering Group, University Hospital Carl Gustav Carus, Technische Universität Dresden, Germany                                                       |
| Garofano, Najia                        | Hôpitaux Universitaires de Genève, Département APSI, service d'anesthésiologie, Switzerland                                                                                                                        |
| Giacconi, Luca Gregorio                | Department of Women, child and General and Specialized Surgery. University of Campania "L. Vanvitelli", Italy.                                                                                                     |
| Gilsanz, Fernando                      | Department of Anesthesiology and Surgical Critical Care, Hospital Universitario La Paz, Madrid, Spain                                                                                                              |
| Girrbach, Felix                        | Department of Anaesthesiology and Intensive Care Medicine, University of Leipzig, Leipzig, Germany;                                                                                                                |
| Gobbi, Luca                            | Department Morphology, Surgery and Experimental Medicine. Anesthesia and intensive care university section. University of Ferrara. Italy                                                                           |
| Godfried, Marc Bernard*                | Department of Anesthesiology, Onze Lieve Vrouwe Gasthuis, Amsterdam, The Netherlands                                                                                                                               |

|                             |                                                                                                                                                                        |
|-----------------------------|------------------------------------------------------------------------------------------------------------------------------------------------------------------------|
| Goettel, Nicolai*           | Department of Anesthesia, Surgical Intensive Care, Prehospital Emergency Medicine and Pain Therapy, University Hospital Basel, University of Basel, Basel, Switzerland |
| Goldstein, Peter A.*        | Weill Cornell Medicine, New York, NY, USA                                                                                                                              |
| Goren, Or                   | Division of Anesthesia, Pain and Critical Care, Tel-Aviv Medical Center affiliated with Sackler Medical School, Tel Aviv University, Tel Aviv, Israel                  |
| Gorlin, Andrew              | Mayo Clinic Arizona, 5777 East Mayo Blvd, Phoenix, AZ, 85054, USA                                                                                                      |
| Granell Gil, Manuel*        | Consorcio Hospital General Universitario of Valencia, Spain                                                                                                            |
| Gratarola, Angelo           | Anestesia e Rianimazione - IRCCS Policlinico San Martino – Genova – Italy                                                                                              |
| Graterol, Juan*             | Royal Cornwall Hospital NHS Trust, UK                                                                                                                                  |
| Guyon, Pierre               | Hôpitaux Universitaires de Genève, Département APSI, service d'anesthésiologie, Switzerland                                                                            |
| Haire, Kevin                | Magill Department of Anaesthesia, Chelsea & Westminster NHS Foundation Trust, 369 Fulham Road, London, SW10 9NH, UK                                                    |
| Harou, Philippe             | Polyclinique Montier la Celle, France                                                                                                                                  |
| Helf, Antonia               | Department of Anaesthesiology, University Hospital Würzburg, Würzburg, Germany                                                                                         |
| Hemmes, Sabrina N. T.*      | Amsterdam UMC, University of Amsterdam, Department of Anesthesiology, Meibergdreef 9, Amsterdam, The Netherlands                                                       |
| Hempel, Gunther             | Department of Anaesthesiology and Intensive Care Medicine, University of Leipzig, Leipzig, Germany;                                                                    |
| Hernández Cádiz, María José | Consorcio Hospital General Universitario of Valencia, Spain                                                                                                            |
| Heyse, Björn                | Ghent University Hospital, Ghent, Belgium. Corneel Heymanslaan 10, 9000 Gent, Belgium                                                                                  |
| Hollmann, Markus W.*        | Amsterdam UMC, University of Amsterdam, Department of Anesthesiology, Meibergdreef 9, Amsterdam, The Netherlands                                                       |
| Huercio, Ivan               | Department of Anesthesiology and Surgical Critical Care, Hospital Universitario La Paz, Madrid, Spain                                                                  |
| Ilievska, Jasmina           | University Clinic of Surgery “Ss. Naum Ohridski”, Faculty of Medicine, University “Ss. Cyril and Methodius”, Skopje, Macedonia                                         |
| Jakus, Lien                 | Hôpitaux Universitaires de Genève, Département APSI, service d'anesthésiologie, Switzerland                                                                            |
| Jeganath, Vijay             | Royal Stoke University Hospital, UHNM NHS Trust, Stoke-on-Trent, Staffordshire, ST4 6QG, UK                                                                            |
| Jelting, Yvonne             | Department of Anaesthesiology, University Hospital Würzburg, Würzburg, Germany                                                                                         |
| Jung, Minoa                 | Hôpitaux Universitaires de Genève, Département APSI, service d'anesthésiologie, Switzerland                                                                            |
| Kabon, Barbara*             | Department of Anaesthesia, Critical Care and Pain Medicine, Medical University Vienna, Austria                                                                         |
| Kacha, Aalok*               | Section of Critical Care Medicine, Department of Anesthesia and Critical Care, University of Chicago, Chicago, IL, USA                                                 |
| Karaman Ilić, Maja          | Clinical hospital Sveti Duh, JJ Strossmayer, Faculty of Medicine, Zagreb, Croatia                                                                                      |
| Karuppiah, Arunthevaraja    | St. Elizabeth's Medical Center, MA, USA                                                                                                                                |



|                           |                                                                                                                                                                                                                   |
|---------------------------|-------------------------------------------------------------------------------------------------------------------------------------------------------------------------------------------------------------------|
| Kavas, Ayse Duygu         | Marmara University Pendik Training and Research Hospital, Turkey                                                                                                                                                  |
| Keli Barcelos, Gleicy     | Hôpitaux Universitaires de Genève, Département APSI, service d'anesthésiologie, Switzerland                                                                                                                       |
| Kellogg, Todd A.          | Department of Surgery, Mayo Clinic, Rochester, Minnesota, USA                                                                                                                                                     |
| Kemper, Johann            | Department of Anesthesiology, University Hospital Duesseldorf, Heinrich-Heine University Duesseldorf, Duesseldorf, Germany                                                                                        |
| Kerbrat, Romain           | Hôpitaux Universitaires de Genève, Département APSI, service d'anesthésiologie, Switzerland                                                                                                                       |
| Khodr, Suraya             | Cleveland Clinic Abu Dhabi, Al Maryah Island, Abu Dhabi, UAE                                                                                                                                                      |
| Kienbaum, Peter           | Department of Anesthesiology, University Hospital Duesseldorf, Heinrich-Heine University Duesseldorf, Duesseldorf, Germany                                                                                        |
| Kir, Bunyamin             | Marmara University Pendik Training and Research Hospital, Turkey                                                                                                                                                  |
| Kiss, Thomas              | Department of Anesthesiology and Intensive Care, Pulmonary Engineering Group, University Hospital Carl Gustav Carus, Technische Universität Dresden, Germany                                                      |
| Kivrak, Selin             | Hôpitaux Universitaires de Genève, Département APSI, service d'anesthésiologie, Switzerland                                                                                                                       |
| Klarić, Vlasta*           | Clinic of anesthesiology, reanimatology and intensive care medicine, University Hospital Dubrava, Zagreb, Croatia                                                                                                 |
| Koch, Thea                | Department of Anesthesiology and Intensive Care, Pulmonary Engineering Group, University Hospital Carl Gustav Carus, Technische Universität Dresden, Germany                                                      |
| Köksal, Ceren             | Fatih Sultan Mehmet Educational and Research Hospital, İstanbul, Turkey                                                                                                                                           |
| Kowark, Ana               | Department of Anesthesiology, Medical Faculty, RWTH Aachen University, Aachen, Germany                                                                                                                            |
| Kranke, Peter*            | Department of Anaesthesiology, University Hospital Würzburg, Würzburg, Germany                                                                                                                                    |
| Kuvaki, Bahar*            | Dokuz Eylül University Faculty of Medicine, Department of Anaesthesiology and Intensive Care, Turkey                                                                                                              |
| Kuzmanovska, Biljana      | University clinic for Traumatology, Orthopedics, Anesthesia, Reanimation, Intensive care and Emergency center - Skopje, Department of Anesthesiology, Reanimation and Intensive care Medicine - Skopje, Macedonia |
| Laffey, John*             | Department of Anesthesiology, St. Michael's Hospital, University of Toronto, Toronto, ON, Canada                                                                                                                  |
| Lange, Mirko              | Department of Anaesthesiology and Intensive Care Medicine, University of Leipzig, Leipzig, Germany;                                                                                                               |
| Lemos, Marília Freitas de | Department of Anesthesiology, Hospital do Câncer II, National Cancer Institute of Brazil (INCA), Rio de Janeiro, Brazil                                                                                           |
| Licker, Marc-Joseph*      | Hôpitaux Universitaires de Genève, Département APSI, service d'anesthésiologie; Faculty of Medicine, University of Geneva, Switzerland                                                                            |
| López-Baamonde, Manuel    | Department of Anaesthesiology, Hospital Clínic, Barcelona, Spain.                                                                                                                                                 |
| López-Hernández, Antonio  | Department of Anaesthesiology, Hospital Clínic, Barcelona, Spain.                                                                                                                                                 |

|                                                                               |                                                                                                                                                                                                                                                                           |
|-------------------------------------------------------------------------------|---------------------------------------------------------------------------------------------------------------------------------------------------------------------------------------------------------------------------------------------------------------------------|
| Lopez-Martinez,<br>Mercedes<br>Luise, Stéphane                                | Department of Anesthesiology and Surgical Critical Care,<br>Hospital Universitario La Paz, Madrid, Spain<br>Hôpitaux Universitaires de Genève, Département APSI, service<br>d'anesthésiologie, Switzerland                                                                |
| MacGregor, Mark*<br>Magalhães, Danielle*<br>Maillard, Julien                  | Ashford and St Peters NHS Foundation Trust, UK<br>Associação Hospitalar Beneficente São Vicente de Paulo, Brazil<br>Hôpitaux Universitaires de Genève, Département APSI, service<br>d'anesthésiologie, Switzerland                                                        |
| Malerbi, Patrizia                                                             | Anestesia e Rianimazione - IRCCS Policlinico San Martino –<br>Genova – Italy                                                                                                                                                                                              |
| Manimekalai, Natesan<br>Margaron, Michael*<br>Markstaller, Klaus*             | University of Mississippi Medical Center, MS, USA<br>St Richard's Hospital, Chichester, UK<br>Department of Anaesthesia, Critical Care and Pain Medicine,<br>Medical University Vienna, Austria                                                                           |
| Martin, David P.                                                              | Department of Anesthesiology and Perioperative Medicine,<br>Mayo Clinic, Rochester, Minnesota, USA                                                                                                                                                                        |
| Martin, Yvette N.                                                             | Department of Anesthesiology and Perioperative Medicine,<br>Mayo Clinic, Rochester, Minnesota, USA                                                                                                                                                                        |
| Martínez-Ocon, Julia                                                          | Department of Anaesthesiology, Hospital Clínic, Barcelona,<br>Spain.                                                                                                                                                                                                      |
| Martin-Loeches,<br>Ignacio*                                                   | Department of Intensive Care Medicine, Multidisciplinary<br>Intensive Care Research Organization (MICRO), St. James's<br>Hospital, Dublin, Ireland                                                                                                                        |
| Maseda, Emilio                                                                | Department of Anesthesiology and Surgical Critical Care,<br>Hospital Universitario La Paz, Madrid, Spain                                                                                                                                                                  |
| Matot, Idit*                                                                  | Division of Anesthesia, Pain and Critical Care, Tel-Aviv Medical<br>Center affiliated with Sackler Medical School, Tel Aviv<br>University, Tel Aviv, Israel                                                                                                               |
| McAuliffe, Niamh                                                              | Department of Anesthesiology, St. Michael's Hospital,<br>University of Toronto, Toronto, ON, Canada                                                                                                                                                                       |
| McKenzie, Travis J.                                                           | Department of Surgery, Mayo Clinic, Rochester, Minnesota,<br>USA                                                                                                                                                                                                          |
| Medina, Paulina                                                               | Department of Anesthesiology. School of Medicine. Pontificia<br>Universidad Católica de Chile                                                                                                                                                                             |
| Meersch, Melanie                                                              | Department of Anesthesiology, Intensive Care and Pain<br>Medicine, University Hospital Münster, Münster, Germany                                                                                                                                                          |
| Menzen, Angelika*<br>Mertens, Els*<br>Meurer, Bernd<br>Meyer-Treschan, Tanja* | St. Marienhospital gGmbH Friesoythe, Friesoythe, Germany<br>University Hospital Antwerp, Belgium<br>Marienhospital Wesel, Wesel, Germany<br>Department of Anesthesiology, University Hospital Duesseldorf,<br>Heinrich-Heine University Duesseldorf, Duesseldorf, Germany |
| Miao, Changhong*                                                              | Department of Anesthesiology, Fudan University Shanghai<br>Cancer Center, Shanghai, China. Department of Oncology,<br>Shanghai Medical College, Fudan University, Shanghai, China                                                                                         |
| Micalizzi, Camilla                                                            | Dipartimento di Scienze Chirurgiche e Diagnostiche Integrate –<br>DISC – Università degli Studi di Genova – Genova – Italy and<br>Anestesia e Terapia Intensiva - IRCCS Policlinico San Martino –<br>Genova – Italy                                                       |
| Milić, Morena                                                                 | Clinic of anesthesiology, reanimatology and intensive care<br>medicine, University Hospital Dubrava, Zagreb, Croatia                                                                                                                                                      |

|                                       |                                                                                                                                                                                                                   |
|---------------------------------------|-------------------------------------------------------------------------------------------------------------------------------------------------------------------------------------------------------------------|
| Módolo, Norma Sueli Pinheiro          | Department of Anesthesiology, Universidade Estadual Paulista, Botucatu/SP, Brazil                                                                                                                                 |
| Moine, Pierre                         | University of Colorado School of Medicine, Department of Anesthesiology, CO, USA                                                                                                                                  |
| Mölders, Patrick                      | Klinik für Anästhesiologie, Intensivmedizin und Schmerztherapie, Universitätsklinikum Knappschaftskrankenhaus Bochum, Bochum, Germany                                                                             |
| Montero-Feijoo, Ana                   | Department of Anesthesiology and Surgical Critical Care, Hospital Universitario La Paz, Madrid, Spain                                                                                                             |
| Moret, Enrique                        | University Hospital Germans Trias i Pujol, ICS, UAB, Spain                                                                                                                                                        |
| Muller, Markus K.                     | Frauenfeld Cantonal Hospital, Switzerland                                                                                                                                                                         |
| Murphy, Zoe                           | York Teaching Hospitals NHS Foundation Trust, UK                                                                                                                                                                  |
| Nalwaya, Pramod*                      | Royal Stoke University Hospital, UHNM NHS Trust, Stoke-on-Trent, Staffordshire, ST4 6QG, UK                                                                                                                       |
| Naumovski, Filip*                     | University clinic for Traumatology, Orthopedics, Anesthesia, Reanimation, Intensive care and Emergency center - Skopje, Department of Anesthesiology, Reanimation and Intensive care Medicine - Skopje, Macedonia |
| Navalesi, Paolo*                      | Anesthesia and Intensive Care, Department of Medical and Surgical Sciences, Magna Graeca University, Catanzaro, Italy                                                                                             |
| Navarro e Lima, Lais Helena           | Department of Anesthesiology, Universidade Estadual Paulista, Botucatu/SP, Brazil                                                                                                                                 |
| Nesek Adam, Višnja*                   | Clinical hospital Sveti Duh, JJ Strossmayer, Faculty of Medicine, Zagreb, Croatia                                                                                                                                 |
| Neumann, Claudia                      | Department of Anaesthesiology and Intensive Care Medicine, University Hospital of Bonn, Bonn, Germany                                                                                                             |
| Newell, Christopher*                  | Southmead Hospital, North Bristol NHS Trust, UK                                                                                                                                                                   |
| Nisnevitch, Zoulfira*                 | Montefiore Medical Center, Bronx, NY 10467, USA                                                                                                                                                                   |
| Nizamuddin, Junaid                    | Section of Critical Care Medicine, Department of Anesthesia and Critical Care, University of Chicago, Chicago, IL, USA                                                                                            |
| Novazzi, Cecilia                      | Universita' dell'Insubria – Dipartimento di Anestesia - Azienda Ospedaliera Asst Settlaghi Ospedale di Circolo e Fondazione Macchi – 21100 Varese - Italy                                                         |
| O'Connor, Michael                     | Section of Critical Care Medicine, Department of Anesthesia and Critical Care, University of Chicago, Chicago, IL, USA                                                                                            |
| Oprea, Günther                        | Klinik für Anästhesiologie, Intensivmedizin und Schmerztherapie, Universitätsklinikum Knappschaftskrankenhaus Bochum, Bochum, Germany                                                                             |
| Orhan Sungur, Mukadder Özbilgin, Şule | Istanbul University, Istanbul Faculty of Medicine, Turkey                                                                                                                                                         |
| Pace, Maria Caterina                  | Dokuz Eylül University Faculty of Medicine, Department of Anaesthesiology and Intensive Care, Turkey                                                                                                              |
| Pacheco, Marcos                       | Department of Women, child and General and Specialized Surgery. University of Campania "L. Vanvitelli", Italy.                                                                                                    |
| Packianathaswamy, Balaji*             | Department of Anesthesiology from Centro Hospitalar de Entre o Douro e Vouga, EPE – São Sebastião Hospital, Santa Maria da Feira, Portugal                                                                        |
| Palma Gonzalez, Estefania             | Hull and East Yorkshire Hospitals NHS Trust, UK                                                                                                                                                                   |
|                                       | Área de Salud Don Benito-Villanueva/Don Benito-Villanueva Health Area, Spain.                                                                                                                                     |

|                            |                                                                                                                                                                                                            |
|----------------------------|------------------------------------------------------------------------------------------------------------------------------------------------------------------------------------------------------------|
| Papaspyros, Fotios*        | POLYCLINIQUE MONTIER LA CELLE, France                                                                                                                                                                      |
| Paredes, Sebastián         | Department of Anesthesiology. School of Medicine. Pontificia Universidad Catolica de Chile                                                                                                                 |
| Passavanti, Maria Beatrice | Department of Women, child and General and Specialized Surgery. University of Campania "L. Vanvitelli", Italy.                                                                                             |
| Pedemonte, Juan Cristobal  | Department of Anesthesiology. School of Medicine. Pontificia Universidad Catolica de Chile                                                                                                                 |
| Pelosi, Paolo*             | Dipartimento di Scienze Chirurgiche e Diagnostiche Integrate – DISC – Università degli Studi di Genova – Genova – Italy and Anestesia e Terapia Intensiva - IRCCS Policlinico San Martino – Genova – Italy |
| Peremin, Sanja             | Clinic of anesthesiology, reanimatology and intensive care medicine, University Hospital Dubrava, Zagreb, Croatia                                                                                          |
| Philipsenburg, Christoph   | Department of Anesthesiology, Heidelberg University Hospital, Im Neuenheimer Feld 110, 69120 Heidelberg, Germany                                                                                           |
| Pinho, Daniela             | Serviço de Anestesiologia, Centro Hospitalar do Porto, Porto, Portugal                                                                                                                                     |
| Pinho, Silvia              | Serviço de Anestesiologia, Centro Hospitalar do Porto, Porto, Portugal                                                                                                                                     |
| Posthuma, Linda M.         | Amsterdam UMC, University of Amsterdam, Department of Anesthesiology, Meibergdreef 9, Amsterdam, The Netherlands                                                                                           |
| Pota, Vincenzo             | Department of Women, child and General and Specialized Surgery. University of Campania "L. Vanvitelli", Italy.                                                                                             |
| Preckel, Benedikt          | Amsterdam UMC, University of Amsterdam, Department of Anesthesiology, Meibergdreef 9, Amsterdam, The Netherlands                                                                                           |
| Priani, Paolo              | Department Morphology, Surgery and Experimental Medicine. Anesthesia and intensive care university section. University of Ferrara. Italy                                                                   |
| Putensen, Christian*       | Department of Anaesthesiology and Intensive Care Medicine, University Hospital of Bonn, Bonn, Germany                                                                                                      |
| Rached, Mohamed Aymen      | Hôpitaux Universitaires de Genève, Département APSI, service d'anesthésiologie, Switzerland                                                                                                                |
| Radoeshki, Aleksandar      | University Clinic of Surgery “Ss. Naum Ohridski”, Faculty of Medicine, University “Ss. Cyril and Methodius”, Skopje, Macedonia                                                                             |
| Ragazzi, Riccardo          | Department Morphology, Surgery and Experimental Medicine. Anesthesia and intensive care university section. University of Ferrara. Italy                                                                   |
| Rajamanickam, Tamilselvan  | Royal Stoke University Hospital, UHNM NHS Trust, Stoke-on-Trent, Staffordshire, ST4 6QG, UK                                                                                                                |
| Rajamohan, Arthi           | Department of Anesthesiology, St. Michael’s Hospital, University of Toronto, Toronto, ON, Canada                                                                                                           |
| Ramakrishna, Harish*       | Mayo Clinic Arizona, 5777 East Mayo Blvd, Phoenix, AZ, 85054, USA                                                                                                                                          |
| Rangarajan, Desikan*       | Homerton University Hospitals NHS Foundation Trust, UK                                                                                                                                                     |
| Reiterer, Christian        | Department of Anaesthesia, Critical Care and Pain Medicine, Medical University Vienna, Austria                                                                                                             |
| Renew, J. Ross             | Department of Anesthesiology and Perioperative Medicine, Mayo Clinic Jacksonville, USA                                                                                                                     |
| Reynaud, Thomas            | Hôpitaux Universitaires de Genève, Département APSI, service d'anesthésiologie, Switzerland                                                                                                                |

|                         |                                                                                                                                                                                                                                                                                            |
|-------------------------|--------------------------------------------------------------------------------------------------------------------------------------------------------------------------------------------------------------------------------------------------------------------------------------------|
| Rhys, Rhidian           | Southmead Hospital, North Bristol NHS Trust, UK                                                                                                                                                                                                                                            |
| Rivas, Eva*             | Department of Anaesthesiology, Hospital Clínic, IDIBAPS, Universitat de Barcelona, Spain                                                                                                                                                                                                   |
| Robitzky, Luisa         | Klinik für Anästhesiologie, Intensivmedizin und Schmerztherapie, Universitätsklinikum Knappschaftskrankenhaus Bochum, Bochum, Germany                                                                                                                                                      |
| Rossaint, Rolf*         | Department of Anesthesiology, Medical Faculty, RWTH Aachen University, Aachen, Germany                                                                                                                                                                                                     |
| Rubulotta, Francesca*   | Imperial College Healthcare NHS Trust, UK                                                                                                                                                                                                                                                  |
| S. Machado, Humberto*   | Serviço de Anestesiologia, Centro Hospitalar do Porto, Porto, Portugal and Instituto Ciências Biomédicas Abel Salazar, Universidade do Porto, Porto, Portugal and Centro de Investigação Clínica em Anestesiologia, Serviço de Anestesiologia, Centro Hospitalar do Porto, Porto, Portugal |
| S. Nunes, Catarina      | Universidade Aberta, Departamento de Ciências e Tecnologia, Porto, Portugal and Centro de Investigação Clínica em Anestesiologia, Serviço de Anestesiologia, Centro Hospitalar do Porto, Porto, Portugal                                                                                   |
| Sabbatini, Giovanni     | Dipartimento di Scienze della Salute, Università degli Studi di Milano, Milan, Italy and SC Anestesia e Rianimazione, ASST Santi Paolo e Carlo, Milan, Italy, Centro ricerca coordinata insufficienza respiratoria                                                                         |
| Sanahuja, Josep Martí   | Department of Anaesthesiology, Hospital Clínic, Barcelona, Spain.                                                                                                                                                                                                                          |
| Sansone, Pasquale       | Department of Women, child and General and Specialized Surgery. University of Campania "L. Vanvitelli", Italy.                                                                                                                                                                             |
| Santos, Alice           | Department of Anaesthesiology, Centro Hospitalar São João, Porto, Portugal                                                                                                                                                                                                                 |
| Sayedahl, Mohamed       | Departments of Anesthesiology, King Abdullah Medical City, Makkah, Saudi Arabia and Mansoura University, Egypt                                                                                                                                                                             |
| Schaefer, Maximilian S. | Department of Anesthesiology, University Hospital Duesseldorf, Heinrich-Heine University Duesseldorf, Duesseldorf, Germany                                                                                                                                                                 |
| Scharffenberg, Martin   | Department of Anesthesiology and Intensive Care, Pulmonary Engineering Group, University Hospital Carl Gustav Carus, Technische Universität Dresden, Germany                                                                                                                               |
| Schiffer, Eduardo       | Hôpitaux Universitaires de Genève, Département APSI, service d'anesthésiologie; Faculty of Medicine, University of Geneva, Switzerland                                                                                                                                                     |
| Schliewe, Nadja         | Department of Anaesthesiology and Intensive Care Medicine, University of Leipzig, Leipzig, Germany;                                                                                                                                                                                        |
| Schorer, Raoul          | Hôpitaux Universitaires de Genève, Département APSI, service d'anesthésiologie, Switzerland                                                                                                                                                                                                |
| Schultz, Marcus J.      | Amsterdam UMC, University of Amsterdam, Department of Anesthesiology, Meibergdreef 9, Amsterdam, The Netherlands                                                                                                                                                                           |
| Schumann, Roman         | Department of Anesthesiology and Perioperative Medicine, Tufts Medical Center, Boston, MA, USA                                                                                                                                                                                             |
| Selmo, Gabriele         | Universita' dell'Insubria – Dipartimento di Anestesia - Azienda Ospedaliera Asst Settlaghi Ospedale di Circolo e Fondazione Macchi – 21100 Varese - Italy                                                                                                                                  |
| Sendra, Mar             | University Hospital Germans Trias i Pujol, ICS, UAB, Spain                                                                                                                                                                                                                                 |
| Senturk, Mert*          | Istanbul University, Istanbul Faculty of Medicine, Turkey                                                                                                                                                                                                                                  |

|                               |                                                                                                                                                                                                            |
|-------------------------------|------------------------------------------------------------------------------------------------------------------------------------------------------------------------------------------------------------|
| Severgnini, Paolo*            | Universita' dell'Insubria – Dipartimento di Anestesia - Azienda Ospedaliera Asst Settlaghi Ospedale di Circolo e Fondazione Macchi – 21100 Varese - Italy                                                  |
| Shaw, Kate                    | York Teaching Hospitals NHS Foundation Trust, UK                                                                                                                                                           |
| Shosholcheva, Mirjana*        | University Clinic of Surgery “Ss. Naum Ohridski”, Faculty of Medicine, University “Ss. Cyril and Methodius”, Skopje, Macedonia                                                                             |
| Sibai, Abdulrazak*            | MINISTRY OF NATIONAL GUARD HEALTH AFFAIRS, KING ABDULAZIZ MEDICAL CITY – RIYADH, Anesthesia Department, Saudi Arabia                                                                                       |
| Simon, Philipp                | Department of Anaesthesiology and Intensive Care Medicine, University of Leipzig, Leipzig, Germany;                                                                                                        |
| Simonassi, Francesca          | Dipartimento di Scienze Chirurgiche e Diagnostiche Integrate – DISC – Università degli Studi di Genova – Genova – Italy and Anestesia e Terapia Intensiva - IRCCS Policlinico San Martino – Genova – Italy |
| Sinno, Claudia                | Universita' dell'Insubria – Dipartimento di Anestesia - Azienda Ospedaliera Asst Settlaghi Ospedale di Circolo e Fondazione Macchi – 21100 Varese - Italy                                                  |
| Sivrikoz, Nukhet              | Istanbul University, Istanbul Faculty of Medicine, Turkey                                                                                                                                                  |
| Skandalou, Vasiliki*          | Alexandra General Hospital, Athens, Greece                                                                                                                                                                 |
| Smith, Neil                   | Hull and East Yorkshire Hospitals NHS Trust, UK                                                                                                                                                            |
| Soares, Maria                 | Serviço de Anestesiologia, Centro Hospitalar do Porto, Porto, Portugal                                                                                                                                     |
| Socorro Artiles, Tania        | University Clinic Hospital Valencia, Spain                                                                                                                                                                 |
| Sousa Castro, Diogo*          | Department of Anesthesiology from Centro Hospitalar de Entre o Douro e Vouga, EPE – São Sebastião Hospital, Santa Maria da Feira, Portugal                                                                 |
| Sousa, Miguel                 | Department of Anesthesiology from Centro Hospitalar de Entre o Douro e Vouga, EPE – São Sebastião Hospital, Santa Maria da Feira, Portugal                                                                 |
| Spadaro, Savino*              | Department Morphology, Surgery and Experimental Medicine. Anesthesia and intensive care university section. University of Ferrara. Italy                                                                   |
| Sprung, Juraj*                | Department of Anesthesiology and Perioperative Medicine, Mayo Clinic, Rochester, Minnesota, USA                                                                                                            |
| Stamatakis, Emmanouil         | Alexandra General Hospital, Athens, Greece                                                                                                                                                                 |
| Steiner, Luzius A.            | Department of Anesthesia, Surgical Intensive Care, Prehospital Emergency Medicine and Pain Therapy, University Hospital Basel, University of Basel, Basel, Switzerland                                     |
| Stevenazzi, Andrea            | University Hospital Germans Trias i Pujol, ICS, UAB, Spain                                                                                                                                                 |
| Suarez-de-la-Rica, Alejandro* | Department of Anesthesiology and Surgical Critical Care, Hospital Universitario La Paz, Madrid, Spain                                                                                                      |
| Suppan, Mélanie               | Hôpitaux Universitaires de Genève, Département APSI, service d'anesthésiologie, Switzerland                                                                                                                |
| Teichmann, Robert             | Department of Anesthesiology and Intensive Care, Pulmonary Engineering Group, University Hospital Carl Gustav Carus, Technische Universität Dresden, Germany                                               |
| Tena Guerrero, José Maria*    | Área de Salud Don Benito-Villanueva/Don Benito-Villanueva Health Area, Spain.                                                                                                                              |

|                               |                                                                                                                                                                                                                                          |
|-------------------------------|------------------------------------------------------------------------------------------------------------------------------------------------------------------------------------------------------------------------------------------|
| Thiel, Bram                   | Department of Anesthesiology, Onze Lieve Vrouwe Gasthuis, Amsterdam, The Netherlands                                                                                                                                                     |
| Tolós, Raquel                 | University Hospital Germans Trias i Pujol, ICS, UAB, Spain                                                                                                                                                                               |
| Tore Altun, Gulbin            | Marmara University Pendik Training and Research Hospital, Turkey                                                                                                                                                                         |
| Tucci, Michelle               | University of Mississippi Medical Center, MS, USA                                                                                                                                                                                        |
| Turnbull, Zachary A.          | Weill Cornell Medicine, New York, NY, USA                                                                                                                                                                                                |
| Turudić, Žana                 | Clinic of anesthesiology, reanimatology and intensive care medicine, University Hospital Dubrava, Zagreb, Croatia                                                                                                                        |
| Unterberg, Matthias           | Klinik für Anästhesiologie, Intensivmedizin und Schmerztherapie, Universitätsklinikum Knappschaftskrankenhaus Bochum, Bochum, Germany                                                                                                    |
| Van Limmen, Jurgen            | Ghent University Hospital, Ghent, Belgium. Corneel Heymanslaan 10, 9000 Gent, Belgium                                                                                                                                                    |
| Van Nieuwenhove, Yves         | Ghent University Hospital, Ghent, Belgium. Corneel Heymanslaan 10, 9000 Gent, Belgium                                                                                                                                                    |
| Van Waesberghe, Julia         | Department of Anesthesiology, Medical Faculty, RWTH Aachen University, Aachen, Germany                                                                                                                                                   |
| Vidal Melo, Marcos Francisco* | Department of Anesthesia, Critical Care and Pain Medicine, Massachusetts General Hospital, Boston, Massachusetts, USA                                                                                                                    |
| Vitković, Bibiana             | Clinic of anesthesiology, reanimatology and intensive care medicine, University Hospital Dubrava, Zagreb, Croatia                                                                                                                        |
| Vivona, Luigi                 | Department of Anesthesiology and Intensive Care, Pulmonary Engineering Group, University Hospital Carl Gustav Carus, Technische Universität Dresden, Germany                                                                             |
| Vizcaychipi, Marcela*         | Magill Department of Anaesthesia, Chelsea & Westminster NHS Foundation Trust, 369 Fulham Road, London, SW10 9NH, UK                                                                                                                      |
| Volta, Carlo Alberto          | Department Morphology, Surgery and Experimental Medicine. Anesthesia and intensive care university section. University of Ferrara. Italy                                                                                                 |
| Weber, Anne                   | Hôpitaux Universitaires de Genève, Département APSI, service d'anesthésiologie, Switzerland                                                                                                                                              |
| Weingarten, Toby N.           | Department of Anesthesiology and Perioperative Medicine, Mayo Clinic, Rochester, Minnesota, USA                                                                                                                                          |
| Wittenstein, Jakob            | Department of Anesthesiology and Intensive Care, Pulmonary Engineering Group, University Hospital Carl Gustav Carus, Technische Universität Dresden, Germany                                                                             |
| Wrigge, Hermann*              | Department of Anaesthesiology and Intensive Care Medicine, University of Leipzig, Leipzig, Germany and Department of Anaesthesiology, Intensive Care and Emergency Medicine, Pain Therapy; Bergmannstrost Hospital Halle, Halle, Germany |
| Wyffels, Piet                 | Ghent University Hospital, Ghent, Belgium. Corneel Heymanslaan 10, 9000 Gent, Belgium                                                                                                                                                    |
| Yagüe, Julio                  | Department of Anesthesiology and Surgical Critical Care, Hospital Universitario La Paz, Madrid, Spain                                                                                                                                    |
| Yates, David                  | York Teaching Hospitals NHS Foundation Trust, UK                                                                                                                                                                                         |
| Yavru, Aysen                  | Istanbul University, Istanbul Faculty of Medicine, Turkey                                                                                                                                                                                |
| Zac, Lilach                   | Division of Anesthesia, Pain and Critical Care, Tel-Aviv Medical Center affiliated with Sackler Medical School, Tel Aviv University, Tel Aviv, Israel                                                                                    |

Zhong, Jing

Department of Anesthesiology, Fudan University Shanghai  
Cancer Center, Shanghai, China. Department of Oncology,  
Shanghai Medical College, Fudan University, Shanghai, China



## **2 Promotion and funding**

The Clinical Trials Network of the European Society of Anaesthesiology (ESA) provided a grant to support building and management of the data bank, preparation of the electronic case report forms, as well as promotion of the trial and steering committee meetings. The Department of Anesthesiology and Intensive Care, University Hospital Carl Gustav Carus, Technische Universität Dresden, Dresden, Germany, supported the investigators at the coordination site in Dresden, Germany. The Conselho Nacional de Desenvolvimento Científico e Tecnológico (CNPq), Brasília, Brazil, partially supported investigators in Brazil (process number 402685/2016-4). Supported in the UK by a grant from the Association of Anaesthetists of Great Britain & Ireland (AAGBI)/ Northern Ireland Society of Anaesthetists (NIAA) awarded to GH Mills.

## eMethods

### 2.1 Inclusion and exclusion criteria

Patients were included if they had a body mass index (BMI)  $\geq 35$  kg/m<sup>2</sup>, were scheduled for laparoscopic or non-laparoscopic surgery expected to exceed 2h (from incision to closure) under general anesthesia, and had an intermediate to high risk of developing postoperative pulmonary complications according to the Assess Respiratory Risk in Surgical Patients in Catalonia (ARISCAT) score <sup>1</sup> (**Table S1**). This score predicts individual preoperative risk for postoperative pulmonary complications using 7 independent predictors, of which 4 are patient-related and 3 surgery-related predictors. An ARISCAT risk score  $\geq 26$  is associated with an intermediate-to-high risk for postoperative pulmonary complications.

Patients were excluded from participation if they: were aged <18 years; underwent any kind of previous lung surgery; were invasively mechanically ventilated for longer than 30 minutes within the last 30 days before surgery; or they received recent immunosuppressive medication (chemotherapy or radiation therapy up to two months prior to surgery). Further exclusion criteria comprises neurosurgical procedures and cardiac surgery, need for one-lung ventilation or planned re-intubation following surgery, need for intraoperative prone or lateral decubitus position and enrollment in another interventional study or refusal to give written informed consent. Additionally, patients showing at least one the following medical conditions are excluded: pregnancy (excluded by anamnesis and /or laboratory analysis), persistent hemodynamic instability or intractable shock (considered hemodynamically unsuitable for the study by the patient's managing physician), history of severe chronic obstructive pulmonary disease (COPD, defined as non-invasive ventilation and/or oxygen therapy at home or repeated systemic corticosteroid therapy for acute exacerbations of COPD), severe cardiac disease (defined as New York Heart Association class III or IV, acute coronary syndrome or persistent ventricular tachyarrhythmia), concurrent acute respiratory distress syndrome (according to the Berlin definition <sup>2</sup>) expected to require prolonged postoperative mechanical ventilation, severe pulmonary arterial hypertension (defined as systolic pulmonary artery pressure > 40 mmHg), intracranial injury or tumor or neuromuscular disease.

### 2.2 Description of the trial interventions

Patients underwent intraoperative lung protective mechanical ventilation with protective low tidal volume of 7 mL/kg predicted body weight (PBW), and were randomly assigned to a PEEP level of 12 cmH<sub>2</sub>O with planned lung recruitment maneuvers performed after intubation, hourly thereafter and preceding extubation (high PEEP group), or a level of PEEP of 4 cmH<sub>2</sub>O without planned recruitment maneuvers (low PEEP group). PEEP levels were maintained throughout the whole period of intraoperative mechanical ventilation.

### 2.3 Standard procedures and recommendations to anesthesiologists

To avoid interference with the trial intervention, routine elements of perioperative anesthesia care (including general anesthesia, postoperative pain management, physiotherapeutic procedures and fluid management) were performed according to each site's specific expertise and clinical routine. The following approaches were recommended (not mandatory) for anesthetic management: 1) to use inhalational isoflurane, desflurane or sevoflurane as the volatile agent, intravenous propofol, remifentanyl or sufentanyl, and cis-atracurium, atracurium, vecuronium, or rocuronium as required; 2) to use balanced solution of prostigmine, or

neostigmine and atropine or glycopyrrolate for reversal of muscle relaxation, guided by neuromuscular function monitoring, 3) to perform postoperative pain management in order to achieve a visual analogue scale (VAS) pain score below 3 and regional or neuraxial analgesia should be used whenever indicated, 4) to use physiotherapy by early mobilization, deep breathing exercises with and without incentive spirometry and stimulation of cough in the postoperative period, 5) to avoid hypo- and hypervolemia, 6) to use invasive measurement of arterial blood pressure whenever indicated, 7) to use appropriate prophylactic antibiotic drugs whenever indicated.

In addition, the study protocol stressed that routine intraoperative monitoring should include measurements of noninvasive blood pressure, pulse oximetry, end-tidal carbon dioxide fraction and electrocardiography. Every patient should receive at least one peripheral venous line to allow adequate fluid resuscitation during the study period. Nasogastric tubes, urinary bladder catheters and/or other intravenous catheters, as well as other, more invasive monitoring may be used according to local practice and/or guidelines. Other procedures should follow the Safe Surgery Checklist of the World Health Organization as published at [www.who.int/patientsafety/safesurgery/en/index.html](http://www.who.int/patientsafety/safesurgery/en/index.html).

## 2.4 Mechanical ventilation

Mechanical ventilation was performed with anesthesia ventilators in use in each individual site participating in the study. Patients were volume-controlled mechanically ventilated with the lowest possible FiO<sub>2</sub>, but at least 0.4, to maintain SpO<sub>2</sub> of > 92%, an inspiratory to expiratory ratio (I:E) of 1:2 and a respiratory rate adjusted to normocapnia (end-tidal carbon dioxide partial pressure between 35 and 45 mmHg). It was left to the discretion of the attending anesthesiologist to use a higher FiO<sub>2</sub>.

Tidal volume was set to 7 mL/kg PBW. The PBW was calculated according to a predefined formula: 50 + 0.91 x (centimeters of height – 152.4) for males, and 45.5 + 0.91 x (centimeters of height – 152.4) for females. Tidal volume throughout this protocol referred to the actual inspired tidal volume in the ventilator circuit.

PEEP was set according to the randomized intervention to 4 vs. 12 cmH<sub>2</sub>O and only modified as part of the rescue strategy (in case of desaturation, see below), or at discretion of the treating physician.

## 2.5 Planned and unplanned recruitment maneuvers

The recruitment maneuver, as part of the high PEEP group strategy, was performed directly after induction of anesthesia, after any disconnection from the mechanical ventilator, every one hour during surgery and before extubation, in a hemodynamically stable situation as judged by the anesthesiologist. Recruitment maneuvers should also be performed as part of a rescue strategy in the low PEEP group. To obtain standardization among centers, recruitment maneuvers were performed in volume-controlled ventilation, according to the following steps:

- I. Peak inspiratory pressure limit set at 55 cmH<sub>2</sub>O
- II. Tidal volume set at 7 ml/kg PBW and respiratory rate at 6 or higher breaths/min, while PEEP was 12 cmH<sub>2</sub>O (or higher if during rescue, see below)
- III. I:E at 1:1
- IV. Tidal volume increased in steps of 4 mL/kg PBW until plateau pressure reached 40 – 50 cmH<sub>2</sub>O

- V. If the maximum tidal volume allowed by the anesthesia ventilator was achieved and the plateau pressure was lower than 40 cmH<sub>2</sub>O, PEEP was increased as needed, but the maximum was 20 cmH<sub>2</sub>O
- VI. Three breaths were allowed while maintaining plateau pressure of 40 – 50 cmH<sub>2</sub>O
- VII. Respiratory rate, I:E, inspiratory pause and tidal volume were set back to pre-recruitment values, while maintaining PEEP at 12 cmH<sub>2</sub>O (or higher if during rescue)

## 2.6 Rescue strategies for intraoperative hypoxemia

If SpO<sub>2</sub> ≤ 92% developed, increase in airway resistance, presence of intrinsic PEEP, hemodynamic impairment and ventilator malfunction must have been excluded before group-specific stepwise rescue strategies could be applied (**Table S2**).

In patients receiving lower PEEP levels, rescue consisted primarily of an increase in FiO<sub>2</sub>, whereas elevation of PEEP levels was restricted to more severe cases of hypoxemia. In the higher PEEP group, the rescue strategy consisted of primarily increase of PEEP before FiO<sub>2</sub> was increased. At any rescue step, the treating physician could consider reducing PEEP if SpO<sub>2</sub> deteriorated further in an otherwise hemodynamic stable patient.

## 2.7 Protocol deviation

Anesthesiologists could deviate from the ventilation protocol at any time if concerns about patient's safety arose, or upon the surgeon's request.

PEEP could be modified according to the anesthesiologist's judgment in presence of any of the following clinical situation: 1) decrease in systolic arterial pressure below 90 mmHg unresponsive to fluids and/or vasoactive drugs, 2) need for a dosage of vasoactive drugs at the tolerance limit, 3) new arrhythmias unresponsive to the treatment suggested by the Advanced Cardiac Life Support Guidelines<sup>3</sup>, 4) blood loss requiring massive transfusion occurred (defined as replacement of >100% blood volume in 24 hours or >50% of blood volume in 4 hours to maintain hematocrit > 21% (hemoglobin > 7 mg/dL)) or 5) any life-threatening surgical complication occurred that might benefit from changes in PEEP.

## 2.8 Definitions

The components of the primary endpoint, namely a composite outcome of postoperative pulmonary complications were defined as follows: 1) mild respiratory failure (PaO<sub>2</sub> < 60 mmHg or SpO<sub>2</sub> < 90% breathing at least 10 min of room air but responding to supplemental oxygen = 2 L/min, excluding hypoventilation), 2) moderate respiratory failure (PaO<sub>2</sub> < 60 mmHg or SpO<sub>2</sub> < 90% breathing at least 10 min of room air but responding only to supplemental oxygen > 2 L/min, excluding hypoventilation), 3) severe respiratory failure (need for non-invasive or invasive mechanical ventilation, excluding hypoventilation due to sedative agents), 4) ARDS, 5) bronchospasm (newly detected expiratory wheezing treated with bronchodilators), 6) new pulmonary infiltrates (chest X-ray demonstrating new mono-lateral or bilateral infiltrate without other clinical signs), 7) pulmonary infection (new or progressive radiographic infiltrate plus at least two of the following: antibiotic treatment, tympanic temperature > 38°C, leukocytosis or leucopenia (white blood cell count < 4000 cells/mm<sup>3</sup> or > 12000 cells/mm<sup>3</sup>) and/or purulent secretions), 8) aspiration pneumonitis (respiratory failure after the inhalation of regurgitated gastric contents), 9) pleural effusion (chest X-ray demonstrating blunting of the costophrenic angle, loss of the sharp silhouette of the ipsilateral hemidiaphragm in upright

position, evidence of displacement of adjacent anatomical structures, or (in supine position) a hazy opacity in one hemithorax with preserved vascular shadows), 10) atelectasis (lung opacification with shift of the mediastinum, hilum, or hemidiaphragm towards the affected area, and compensatory overinflation in the adjacent non-atelectatic lung), 11) cardiopulmonary edema (clinical signs of congestion, including dyspnea, edema, rales and jugular venous distention, with the chest X-ray demonstrating increase in vascular markings and diffuse alveolar interstitial infiltrates) and 12) pneumothorax (air in the pleural space with no vascular bed surrounding the visceral pleura).

The secondary outcomes were: 1) composite of severe postoperative pulmonary complications, defined as any of the above mentioned adverse pulmonary events, except to mild respiratory failure; 2) intraoperative adverse events, e.g. hypoxemia (defined as  $SpO_2 \leq 92\%$ ), hypotension (defined as systolic blood pressure  $< 90\text{mmHg}$ ) and bradycardia (defined as heart rate  $< 50$  bpm), 3) unexpected need for intensive care unit (ICU) admission or ICU readmission, 4) hospital-free days at follow-up day 90, 5) impaired post-operative wound healing (defined as an interruption in the timely and predictable recovery of mechanical integrity in the injured tissue) and 6) 5-day and in-hospital mortality, as well as 7) postoperative extra-pulmonary complications (PEPCs). PEPCs included systemic inflammatory response syndrome (SIRS), sepsis, severe sepsis and septic shock (all according to consensus criteria <sup>4</sup>), extra-pulmonary infection (wound infection or any other infection), coma (Glasgow Coma Score  $< 8$  in the absence of therapeutic coma or sedation), acute myocardial infarction (according to universal definition of myocardial infarction <sup>5</sup>), acute renal failure (according to the risk, injury, failure, loss, end-stage kidney disease [RIFLE] classification system <sup>6</sup>), disseminated intravascular coagulation (DIC) (according to the International Society of Thrombosis and Hemostasis diagnostic scoring system for DIC <sup>7</sup>), gastro-intestinal failure (GIF) (defined according to the GIF-score <sup>8</sup>) and hepatic failure (defined as ratio of total bilirubin on postoperative day 5 to postoperative day 1  $> 1.7$  and ratio of international normalized ratio (INR) on postoperative day 5 to postoperative day 1  $> 1.0$ , or new presence of hepatic encephalopathy and coagulopathy (INR  $> 1.5$ ) within 8 weeks after initial signs of liver injury (e.g. jaundice) without evidence for chronic liver disease)(adapted from Du et al. <sup>9</sup> and Wlodzimirow et al. <sup>10</sup>).

**eTable 1. The Assess Respiratory Risk in Surgical Patients in Catalonia (ARISCAT) score**

|                                                | <b>Multivariate Analysis,<br/>OR (95% CI), n = 1624</b> | <b>β Coefficient</b> | <b>Risk Score<sup>§</sup></b> |
|------------------------------------------------|---------------------------------------------------------|----------------------|-------------------------------|
| <b>Age, years</b>                              |                                                         |                      |                               |
| ≤ 50                                           | 1                                                       |                      |                               |
| 51 – 80                                        | 1.4 (0.6 - 3.3)                                         | 0.331                | 3                             |
| > 80                                           | 5.1 (1.9 - 13.3)                                        | 1.619                | 16                            |
| <b>Preoperative SpO<sub>2</sub>, %</b>         |                                                         |                      |                               |
| ≥ 96                                           | 1                                                       |                      |                               |
| 91 – 95                                        | 2.2 (1.2 - 4.2)                                         | 0.802                | 8                             |
| ≤ 90                                           | 10.7 (4.1 - 28.1)                                       | 2.375                | 24                            |
| <b>Respiratory infection in the last month</b> | 5.5 (2.6 - 11.5)                                        | 1.698                | 17                            |
| <b>Preoperative anemia (≤ 10 g/dl)</b>         | 3.0 (1.4 - 6.5)                                         | 1.105                | 11                            |
| <b>Surgical incision</b>                       |                                                         |                      |                               |
| Peripheral                                     | 1                                                       |                      |                               |
| Upper abdominal                                | 4.4 (2.3 - 8.5)                                         | 1.480                | 15                            |
| Intrathoracic                                  | 11.4 (4.9 - 26.0)                                       | 2.431                | 24                            |
| <b>Duration of surgery, hours</b>              |                                                         |                      |                               |
| ≤ 2                                            | 1                                                       |                      |                               |
| > 2 to 3                                       | 4.9 (2.4 - 10.1)                                        | 1.593                | 16                            |
| > 3                                            | 9.7 (4.7 - 19.9)                                        | 2.268                | 23                            |
| <b>Emergency procedure</b>                     | 2.2 (1.04 - 4.5)                                        | 0.768                | 8                             |

Legend: A risk score  $\geq 26$  predicts an intermediate-to-high risk for postoperative pulmonary complications). CI, confidence interval; OR, odds ratio; SpO<sub>2</sub>, peripheral oxyhemoglobin saturation by pulse oximetry breathing air in supine position; g/dL, gram per deciliter; § The simplified risk score was the sum of each logistic regression coefficient multiplied by 10, after rounding off its value

**Table 2. Rescue strategies for intraoperative hypoxemia**

| Step | Lower PEEP       |                           |       | Higher PEEP      |                           |       |
|------|------------------|---------------------------|-------|------------------|---------------------------|-------|
|      | FiO <sub>2</sub> | PEEP [cmH <sub>2</sub> O] |       | FiO <sub>2</sub> | PEEP [cmH <sub>2</sub> O] |       |
| 1    | 0.5              | 4                         |       | 0.4              | 14                        | (+RM) |
| 2    | 0.6              | 4                         |       | 0.4              | 16                        | (+RM) |
| 3    | 0.7              | 4                         |       | 0.4              | 18                        | (+RM) |
| 4    | 0.8              | 4                         |       | 0.5              | 18                        |       |
| 5    | 0.9              | 4                         |       | 0.6              | 18                        |       |
| 6    | 1.0              | 4                         |       | 0.7              | 18                        |       |
| 7    | 1.0              | 5                         |       | 0.8              | 18                        |       |
| 8    | 1.0              | 6                         |       | 0.9              | 18                        |       |
| 9    | 1.0              | 7                         | (+RM) | 1.0              | 18                        |       |
| 10   |                  |                           |       | 1.0              | 20                        | (+RM) |

Legend: If intraoperative hypoxemia, defined as oxygen saturation  $\leq 92\%$ , develops, sequences of interventions will be used according to group assignment. FiO<sub>2</sub>, inspiratory fraction of oxygen; PEEP, positive end-expiratory airway pressure; RM, lung recruitment maneuver

**eTable 3. Types of intraoperative IV fluids**

|                              | High PEEP<br>n=989 | Low PEEP<br>n=987 | P value |
|------------------------------|--------------------|-------------------|---------|
| Total fluids – mL, mean (SD) | 1898 (1401)        | 1882 (1352)       | 0.79    |
| Crystalloids, No. (%)        | 920 (93.0)         | 928 (94.0)        | 0.37    |
| Synthetic colloids, No. (%)  | 1838 (1306)        | 1841 (1298)       | 0.97    |
| HES, No. (%)                 | 74 (7.5)           | 56 (5.7)          | 0.10    |
| Gelatines, No. (%)           | 50 (211)           | 35 (171)          | 0.09    |
| Dextran, No. (%)             | 45 (4.6)           | 32 (3.2)          | 0.13    |
| Other, No. (%)               | 32 (178)           | 21 (139)          | 0.15    |
| HES, No. (%)                 | 31 (3.1)           | 24 (2.4)          | 0.34    |
| Gelatines, No. (%)           | 17 (104)           | 13 (102)          | 0.38    |
| Dextran, No. (%)             | 1 (0.1)            | 0 (0.0)           | 0.99    |
| Other, No. (%)               | 1 (15.9)           | 0 (0)             | 0.32    |

PEEP, positive end-expiratory pressure; HES, hydroxyl-ethyl -starch containing solution.



**Table 4. Types of intraoperative vasoactive drugs**

|                           | High PEEP<br>n=989 | Low PEEP<br>n=987 | P value |
|---------------------------|--------------------|-------------------|---------|
| Need for vasoactive drugs | 491 (49.6)         | 439 (44.5)        | 0.02    |
| Dopamine, No. (%)         | 0 (0.0)            | 2 (0.2)           | 1.00    |
| (mg)                      | 0.0 (0.0)          | 0.0 (1.5)         | 0.16    |
| Norepinephrine, No. (%)   | 164 (16.6)         | 154 (15.6)        | 0.55    |
| (mg)                      | 0.3 (1.2)          | 0.2 (1.2)         | 0.36    |
| Phenylephrine, No. (%)    | 232 (23.5)         | 190 (19.3)        | 0.02    |
| (mg)                      | 0.7 (5.5)          | 0.5 (4.4)         | 0.26    |
| Epinephrine, No. (%)      | 14 (1.4)           | 15 (1.5)          | 0.85    |
| (mg)                      | 0.0 (0.7)          | 0.0 (0.7)         | 0.37    |
| Use of inotropic drug     |                    |                   |         |
| Dobutamine, No. (%)       | 1 (0.1)            | 1 (0.1)           | 1.00    |
| (mg)                      | 0.0 (0.9)          | 0.0 (0.0)         | 0.32    |

PEEP, positive end-expiratory pressure.

**eTable 5. Types of anesthetic, muscle paralyzing and reversal agents**

|                                             | High PEEP<br>n=989 | Low PEEP<br>n=987 | P value |
|---------------------------------------------|--------------------|-------------------|---------|
| Volatile anesthetics, No.(%)                |                    |                   |         |
| Desflurane                                  | 469 (47.4)         | 468 (47.4)        | 1.00    |
| Sevoflurane                                 | 401 (40.5)         | 411 (41.6)        | 0.62    |
| Isoflurane                                  | 40 (4.0)           | 37 (3.7)          | 0.73    |
| Intravenous anesthetics, No.(%)             |                    |                   |         |
| Propofol                                    | 927 (93.7)         | 911 (92.3)        | 0.21    |
| Midazolam                                   | 278 (28.1)         | 287 (29.1)        | 0.63    |
| Thiopental                                  | 37 (3.7)           | 40 (4.1)          | 0.72    |
| Ketamine                                    | 144 (14.6)         | 136 (13.8)        | 0.62    |
| Etomidate                                   | 7 (0.7)            | 7 (0.7)           | 1.00    |
| Dexmedetomidine                             | 78 (7.9)           | 79 (8.0)          | 0.92    |
| Others                                      | 38 (3.8)           | 31 (3.1)          | 0.40    |
| Analgesics, No.(%)                          |                    |                   |         |
| Morphine                                    | 160 (16.2)         | 158 (16.0)        | 0.92    |
| Alfentanil                                  | 7 (0.7)            | 8 (0.8)           | 0.79    |
| Fentanyl                                    | 539 (54.5)         | 570 (57.8)        | 0.15    |
| Sufentanil                                  | 239 (24.2)         | 208 (21.1)        | 0.10    |
| Remifentanil                                | 331 (33.5)         | 339 (34.3)        | 0.68    |
| Lidocaine                                   | 320 (32.4)         | 313 (31.7)        | 0.76    |
| Procaine                                    | 2 (0.2)            | 0 (0.0)           | 0.48    |
| NSAIDS                                      | 236 (23.9)         | 239 (24.2)        | 0.85    |
| Others                                      | 308 (31.1)         | 280 (28.4)        | 0.18    |
| Muscle paralyzing agents, No.(%)            |                    |                   |         |
| Atracurium                                  | 27 (2.7)           | 24 (2.4)          | 0.68    |
| Cis-atracurium                              | 66 (6.7)           | 51 (5.2)          | 0.16    |
| Mivacurium                                  | 1 (0.1)            | 2 (0.2)           | 1.00    |
| Pancuronium                                 | 5 (0.5)            | 2 (0.2)           | 0.45    |
| Vecuronium                                  | 47 (4.8)           | 48 (4.9)          | 0.91    |
| Rocuronium                                  | 847 (85.6)         | 848 (85.9)        | 0.86    |
| Succinylcholine                             | 240 (24.3)         | 234 (23.7)        | 0.77    |
| Others                                      | 4 (0.4)            | 3 (0.3)           | 0.71    |
| Reversal of muscle paralysis agents, No.(%) |                    |                   |         |
| Sugammadex                                  | 438 (44.3)         | 434 (44.0)        | 0.89    |
| Cholinesterase inhibitors                   | 290 (29.3)         | 295 (29.9)        | 0.78    |

PEEP, positive end-expiratory pressure.

**eTable 6. Further characteristics of surgery**

|                                                                 | High PEEP<br>n=989 | Low PEEP<br>n=987 | P value |
|-----------------------------------------------------------------|--------------------|-------------------|---------|
| Priority of surgery, No.(%)                                     |                    |                   |         |
| Elective                                                        | 962 (97.8)         | 958 (97.6)        | 0.64    |
| Emergency                                                       | 13 (1.3)           | 11 (1.1)          |         |
| Urgent                                                          | 9 (0.9)            | 13 (1.3)          |         |
| Positioning during surgery, No.(%)                              |                    |                   |         |
| Supine                                                          | 357 (36.2)         | 367 (37.2)        | 0.69    |
| Trendelenburg                                                   | 86 (8.7)           | 69 (7.0)          |         |
| Reverse Trendelenburg                                           | 486 (49.3)         | 491 (49.8)        |         |
| Lithotomy                                                       | 17 (1.7)           | 16 (1.6)          |         |
| Seated                                                          | 39 (4.0)           | 43 (4.4)          |         |
| Surgical wound classification, No.(%)                           |                    |                   |         |
| Clean                                                           | 514 (52.1)         | 525 (53.2)        | 0.46    |
| Clean-contaminated                                              | 461 (46.8)         | 450 (45.6)        |         |
| Contaminated                                                    | 10 (1.0)           | 7 (0.7)           |         |
| Dirty                                                           | 1 (0.1)            | 4 (0.4)           |         |
| Intra-abdominal pressure during laparoscopy - (mmHg), mean (SD) | 14.7 (3.6)         | 14.5 (2.1)        | 0.17    |

PEEP, positive end-expiratory pressure.

**eTable 7. Assessment of postoperative pain and dyspnea**

|                                                  | High PEEP<br>n=989 | Low PEEP<br>n=987 | P value |
|--------------------------------------------------|--------------------|-------------------|---------|
| VAS dyspnea – cm, mean (SD), No.                 |                    |                   |         |
| Day 1                                            | 1.8 (1.5), 912     | 1.8 (1.4), 917    | 0.53    |
| Day 2                                            | 1.4 (1.0), 840     | 1.5 (1.0), 844    | 0.57    |
| Day 3                                            | 1.4 (0.9), 619     | 1.3 (0.8), 617    | 0.68    |
| Day 4                                            | 1.3 (0.9), 461     | 1.3 (0.8), 459    | 0.79    |
| Day 5                                            | 1.2 (0.9), 336     | 1.2 (0.8), 330    | 0.78    |
| VAS thoracic – cm, mean (SD), No.                |                    |                   |         |
| Day 1                                            | 1.6 (1.3), 914     | 1.7 (1.4), 913    | 0.52    |
| Day 2                                            | 1.3 (0.8), 838     | 1.4 (3.9), 841    | 0.34    |
| Day 3                                            | 1.2 (0.6), 620     | 1.2 (0.6), 617    | 0.94    |
| Day 4                                            | 1.1 (0.5), 461     | 1.2 (0.5), 459    | 0.20    |
| Day 5                                            | 1.1 (0.4), 336     | 1.1 (0.5), 330    | 0.16    |
| VAS abdominal rest pain – cm, mean (SD), No.     |                    |                   |         |
| Day 1                                            | 2.7 (1.8), 950     | 2.9 (1.9), 958    | 0.10    |
| Day 2                                            | 2.1 (1.5), 881     | 2.1 (1.4), 889    | 0.31    |
| Day 3                                            | 1.8 (1.3), 647     | 1.8 (1.2), 650    | 0.94    |
| Day 4                                            | 1.6 (1.2), 469     | 1.6 (1.0), 475    | 0.75    |
| Day 5                                            | 1.5 (1.0), 346     | 1.5 (1.0), 337    | 0.83    |
| VAS abdominal incident pain – cm, mean (SD), No. |                    |                   |         |
| Day 1                                            | 3.7 (2.4), 916     | 3.7 (2.3), 929    | 0.52    |
| Day 2                                            | 2.8 (2.0), 837     | 2.9 (1.9), 857    | 0.51    |
| Day 3                                            | 2.4 (1.7), 615     | 2.4 (1.7), 627    | 0.55    |
| Day 4                                            | 2.0 (1.5), 458     | 2.1 (1.5), 459    | 0.69    |
| Day 5                                            | 1.9 (1.4), 339     | 1.9 (1.5), 333    | 0.58    |

PEEP, positive end-expiratory pressure; VAS, visual analogue scale.

**eTable 8. Per-protocol analysis**

|                                       | High PEEP<br>n=917 | Low PEEP<br>n=912 | Effect Estimate<br>95% CI | P value |
|---------------------------------------|--------------------|-------------------|---------------------------|---------|
| <b>Primary outcome</b>                |                    |                   |                           |         |
| Postoperative pulmonary complications | 186 / 917 (20.3)   | 209 / 912 (22.9)  | 0.92 (0.82 – 1.04)        | 0.17    |
| Mild respiratory failure              | 119 / 917 (13.0)   | 140 / 912 (15.4)  | 0.90 (0.78 – 1.04)        | 0.15    |
| Moderate respiratory failure          | 38 / 917 (4.1)     | 51 / 912 (5.6)    | 0.84 (0.66 – 1.07)        | 0.15    |
| Severe respiratory failure            | 25 / 917 (2.7)     | 35 / 912 (3.8)    | 0.83 (0.61 – 1.11)        | 0.18    |
| ARDS                                  | 3 / 917 (0.3)      | 1 / 912 (0.1)     | 1.50 (0.84 – 2.64)        | 0.62    |
| Bronchospasm                          | 11 / 917 (1.2)     | 10 / 912 (1.1)    | 1.04 (0.69 – 1.57)        | 0.84    |
| New pulmonary infiltrates             | 14 / 917 (1.5)     | 14 / 912 (1.5)    | 0.99 (0.68 – 1.44)        | 0.99    |
| Pulmonary infection                   | 10 / 917 (1.1)     | 9 / 912 (1.0)     | 1.05 (0.68 – 1.61)        | 0.83    |
| Aspiration pneumonitis                | 2 / 917 (0.2)      | 1 / 912 (0.1)     | 1.33 (0.59 – 2.96)        | 1.00    |
| Pleural effusion                      | 38 / 917 (4.1)     | 18 / 912 (2.0)    | 1.37 (1.14 – 1.65)        | 0.01    |
| Atelectasis                           | 38 / 917 (4.1)     | 50 / 912 (5.5)    | 0.85 (0.67 – 1.09)        | 0.18    |
| Cardiopulmonary edema                 | 15 / 917 (1.6)     | 7 / 912 (0.8)     | 1.36 (1.02 – 1.82)        | 0.09    |
| Pneumothorax                          | 1 / 917 (0.1)      | 2 / 912 (0.2)     | 0.66 (0.13 – 3.29)        | 0.62    |

PEEP, positive end-expiratory pressure; CI, confidence interval; ARDS, acute respiratory distress syndrome.

**eTable 9. Sensitivity analysis for the primary outcome**

|                                     | High PEEP<br>n=989 | Low PEEP<br>n=987 | Odds ratio<br>95% CI             | P value |
|-------------------------------------|--------------------|-------------------|----------------------------------|---------|
| Random-effect model                 | —                  | —                 | 0.86 (0.68 – 1.08)*              | 0.19    |
| Count events                        | 0.35 (0.88)        | 0.38 (0.86)       |                                  |         |
| Median (IQR)                        | 0 (0 – 0)          | 0 (0 – 0)         | 0.88 (0.72 – 1.09) <sup>£</sup>  | 0.25    |
| Common effect GEE                   | —                  | —                 | 0.93 (0.80 – 1.08) <sup>¥</sup>  | 0.37    |
| Treatment-component interaction GEE | —                  | —                 | —                                | 0.11**  |
| Average relative effect GEE         | —                  | —                 | 0.99 (0.94 – 1.05) <sup>££</sup> | 0.98    |

PEEP: positive end expiratory pressure; IQR: interquartile range; GEE: generalized estimating equations

\* 95% confidence intervals and p values calculated in a mixed-effect model with study sites as random-effects

£ 95% confidence intervals calculated with proportional odds logistic regression and p values calculated Wilcoxon rank-sum test

¥ 95% confidence intervals and p values calculated in a common effect GEE model (estimating a single treatment effect across all 12 components)

\*\* p value calculated in a GEE model (test whether the treatment effect differs across the 12 components)

££ p value calculated in a GEE model (estimating, then averaging, the 12 distinct treatment effects)

Figure 1. Effect size (Z) according to the enrollment of patients in the trial

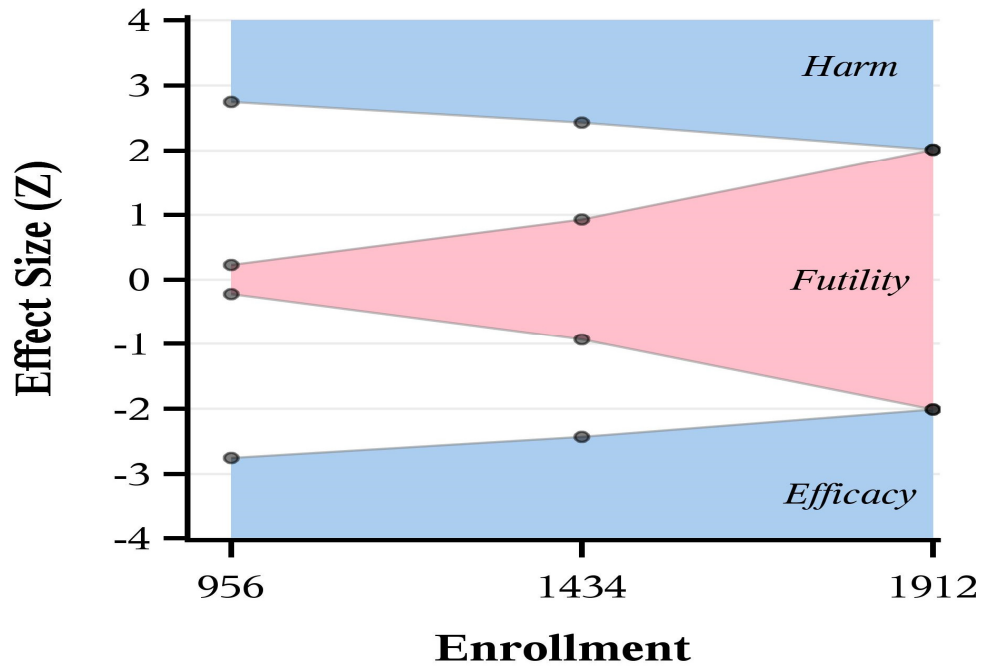

Numbers of patients enrolled in the figure do not include dropouts.

**eFigure 2. Tidal volume during anesthesia**

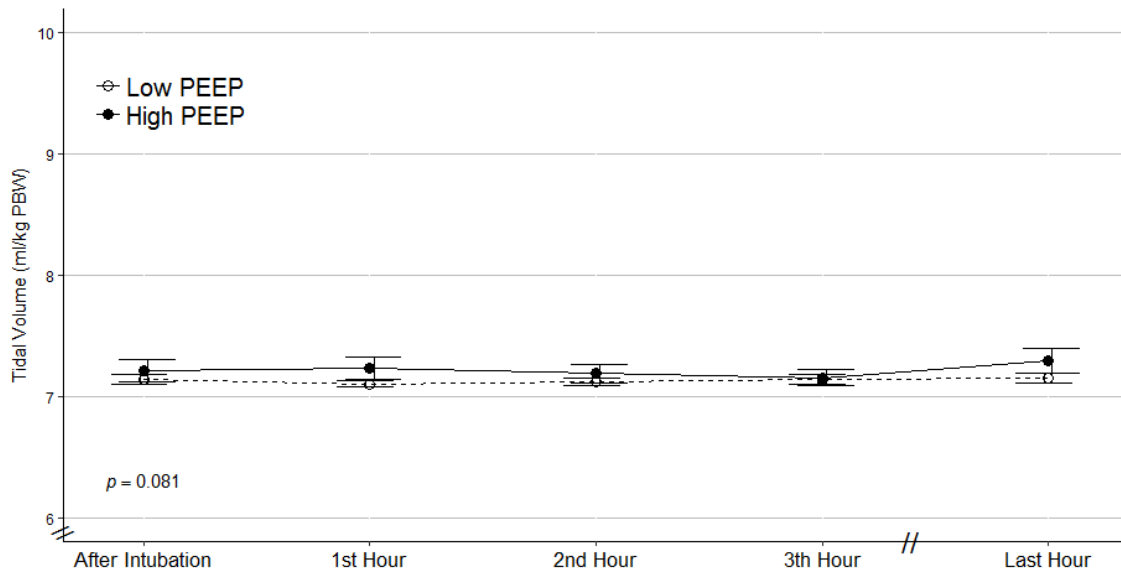

PEEP, positive end-expiratory pressure. Dots are mean and error bars are 95% confidence intervals. P-value from a time vs. group interaction calculated in a mixed-effect linear model.



Figure 3. Positive end-expiratory pressure during anesthesia

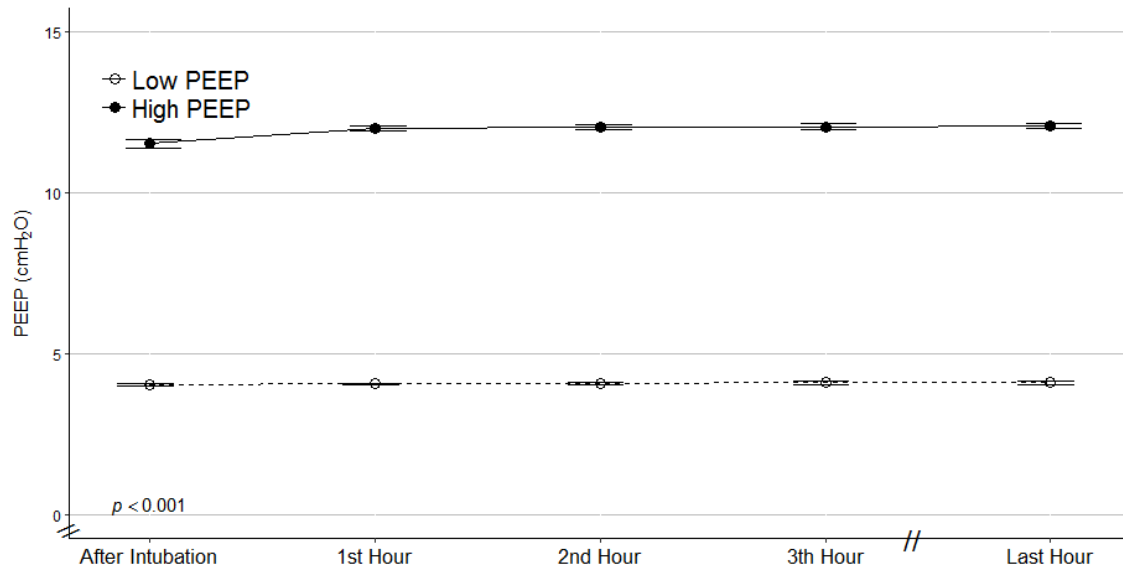

PEEP, positive end-expiratory pressure. Dots are mean and error bars are 95% confidence intervals. P-value from a time vs. group interaction calculated in a mixed-effect linear model.

**Figure 4. Peak pressure during anesthesia**

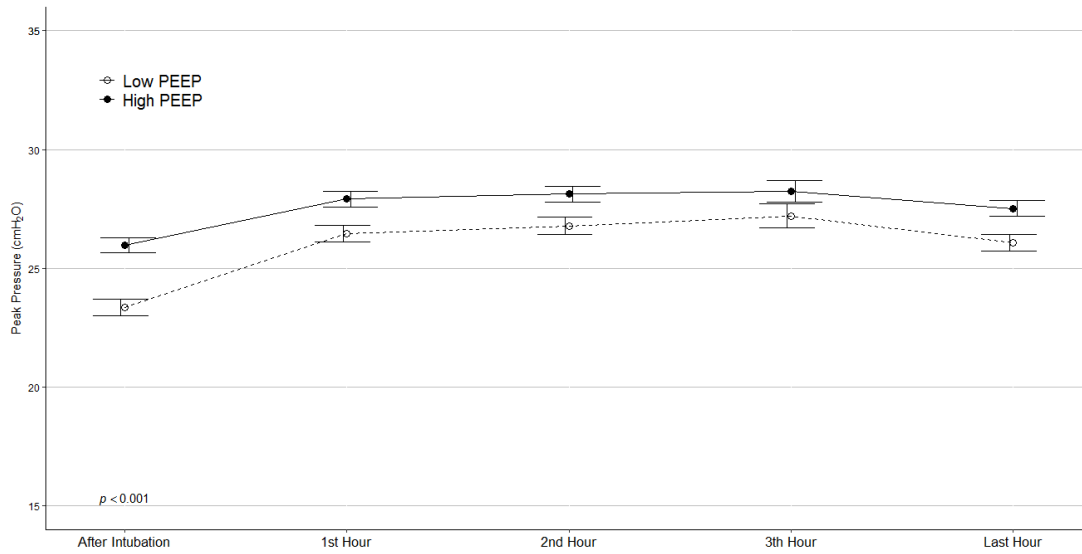

Inspiratory peak pressure values were read from the anesthesia ventilator. PEEP, positive end-expiratory pressure. Dots are mean and error bars are 95% confidence intervals. P-value from a time vs. group interaction calculated in a mixed-effect linear model.

**Figure 5. Peripheral oxyhemoglobin saturation during anesthesia**

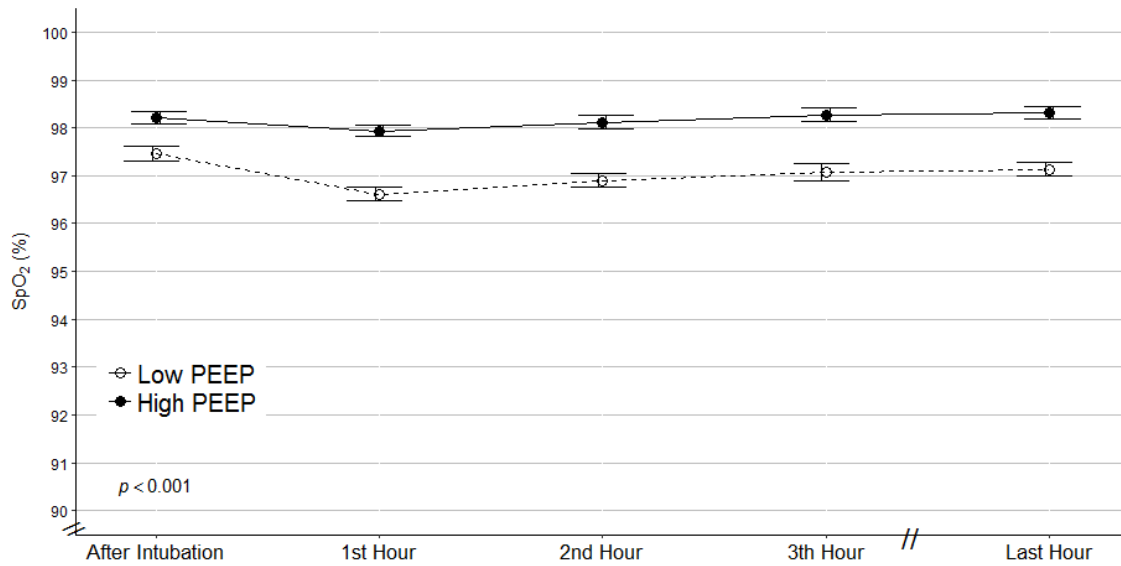

PEEP, positive end-expiratory pressure. Dots are mean and error bars are 95% confidence intervals. P-value from a time vs. group interaction calculated in a mixed-effect linear model.

**Figure 6. Driving pressure during anesthesia**

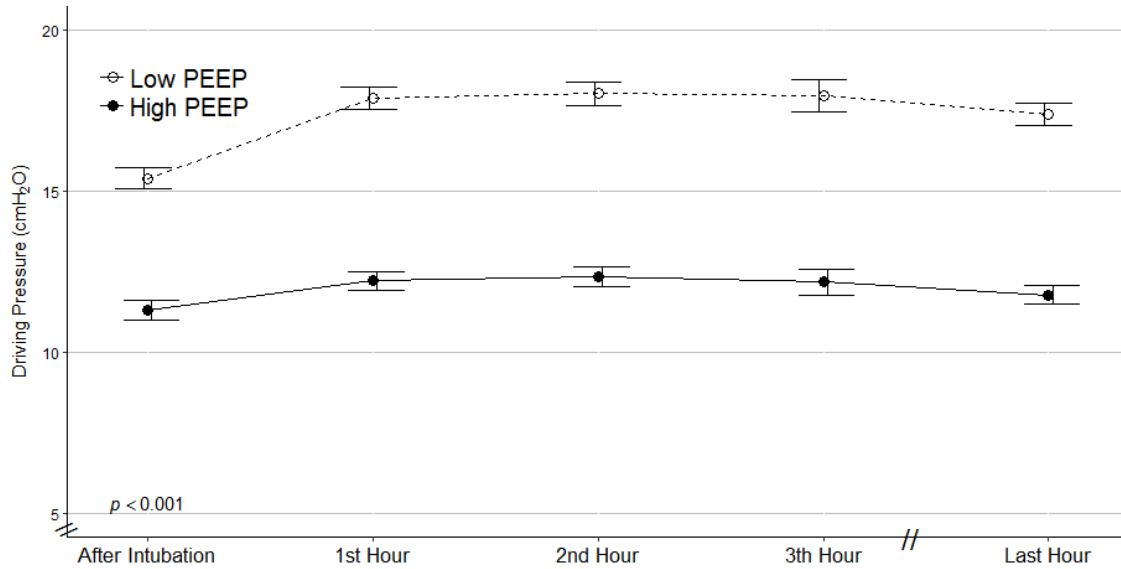

Driving pressure was calculated as airway plateau pressure minus positive end-expiratory pressure. PEEP, positive end-expiratory pressure. Dots are mean and error bars are 95% confidence intervals. P-value from a time vs. group interaction calculated in a mixed-effect linear model.

**Figure 7. Fraction of inspiratory oxygen during anesthesia**

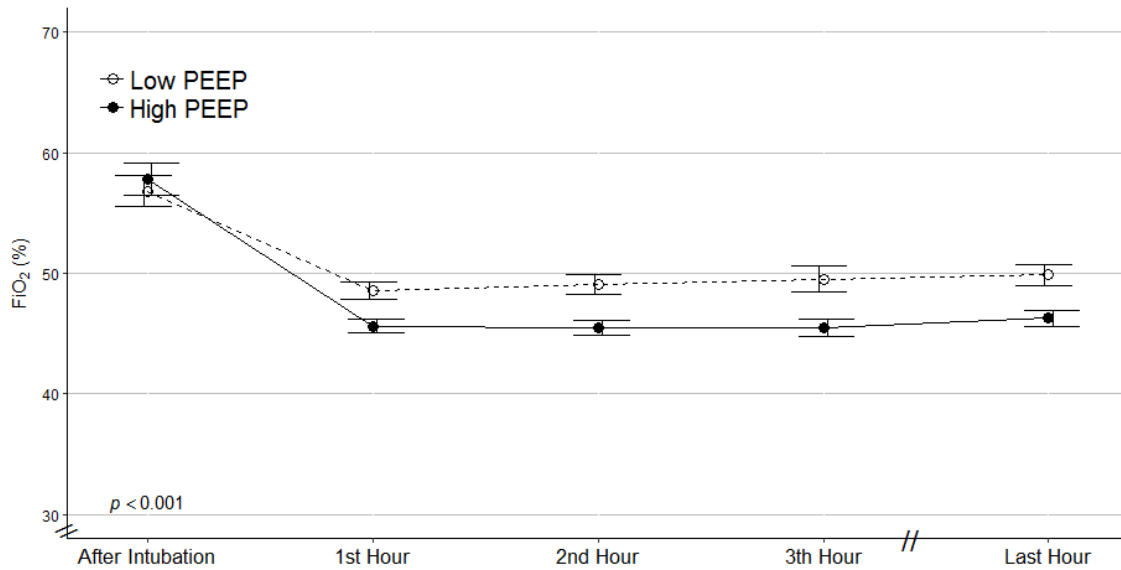

PEEP, positive end-expiratory pressure. Dots are mean and error bars are 95% confidence intervals. P-value from a time vs. group interaction calculated in a mixed-effect linear model.

**Figure 8. Probability of postoperative pulmonary complications in the first 5 postoperative days**

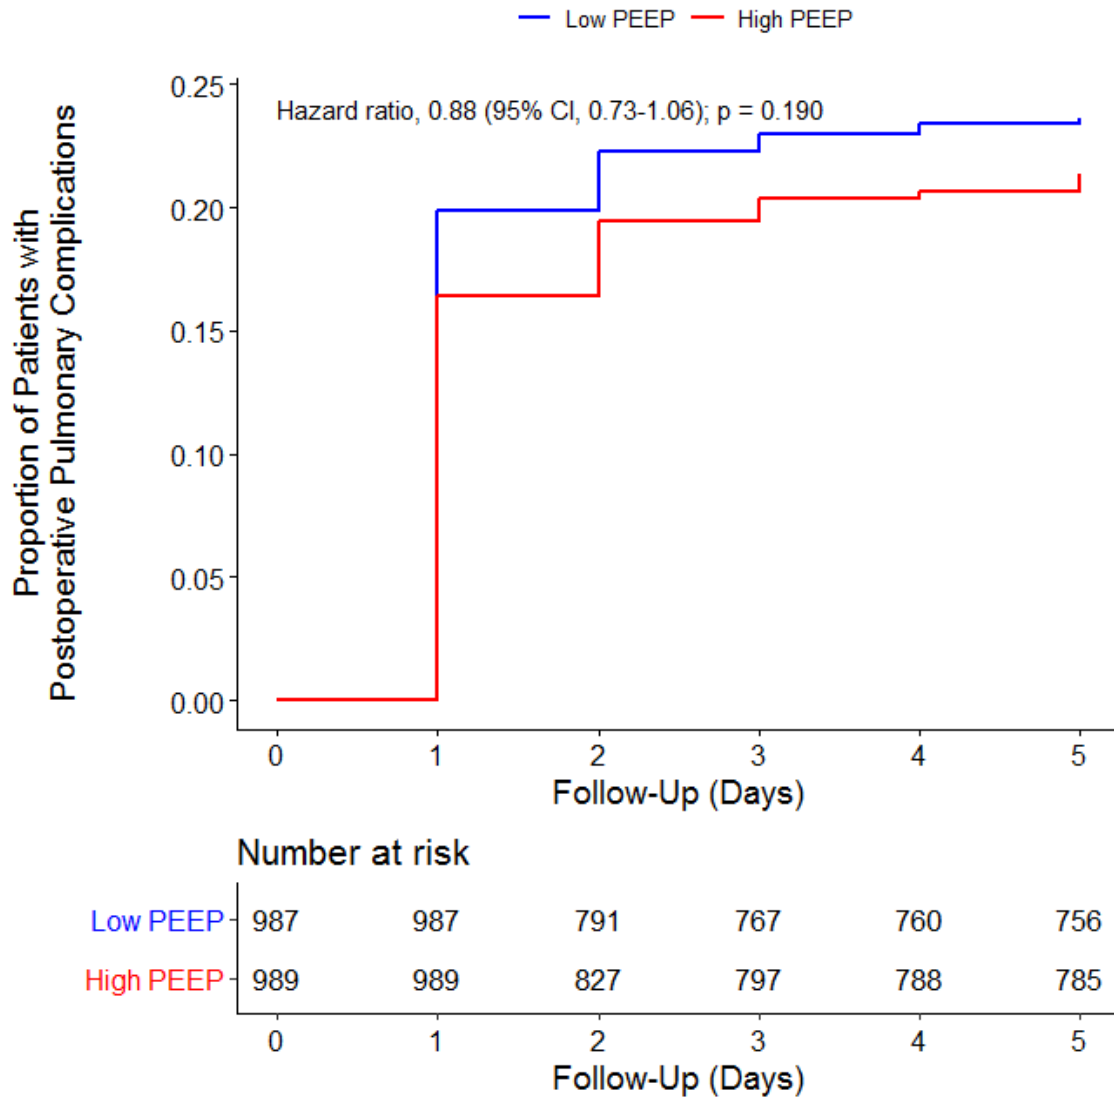

Median observation time was not computed for incidence of postoperative pulmonary complications because the maximum value observed was 0.23. With a median follow-up of 4 (2 – 5) days, the rate of postoperative pulmonary complications within the first 5 postoperative days was 21.3% in the high PEEP group and 23.6% in the low PEEP group (hazard ratio for postoperative pulmonary complications, 0.88; 95% confidence interval 0.73 to 1.06; P=0.190). P value for the Schoenfeld residuals was 0.05.

**Figure 9. Probability of severe postoperative pulmonary complications in the first 5 postoperative days**

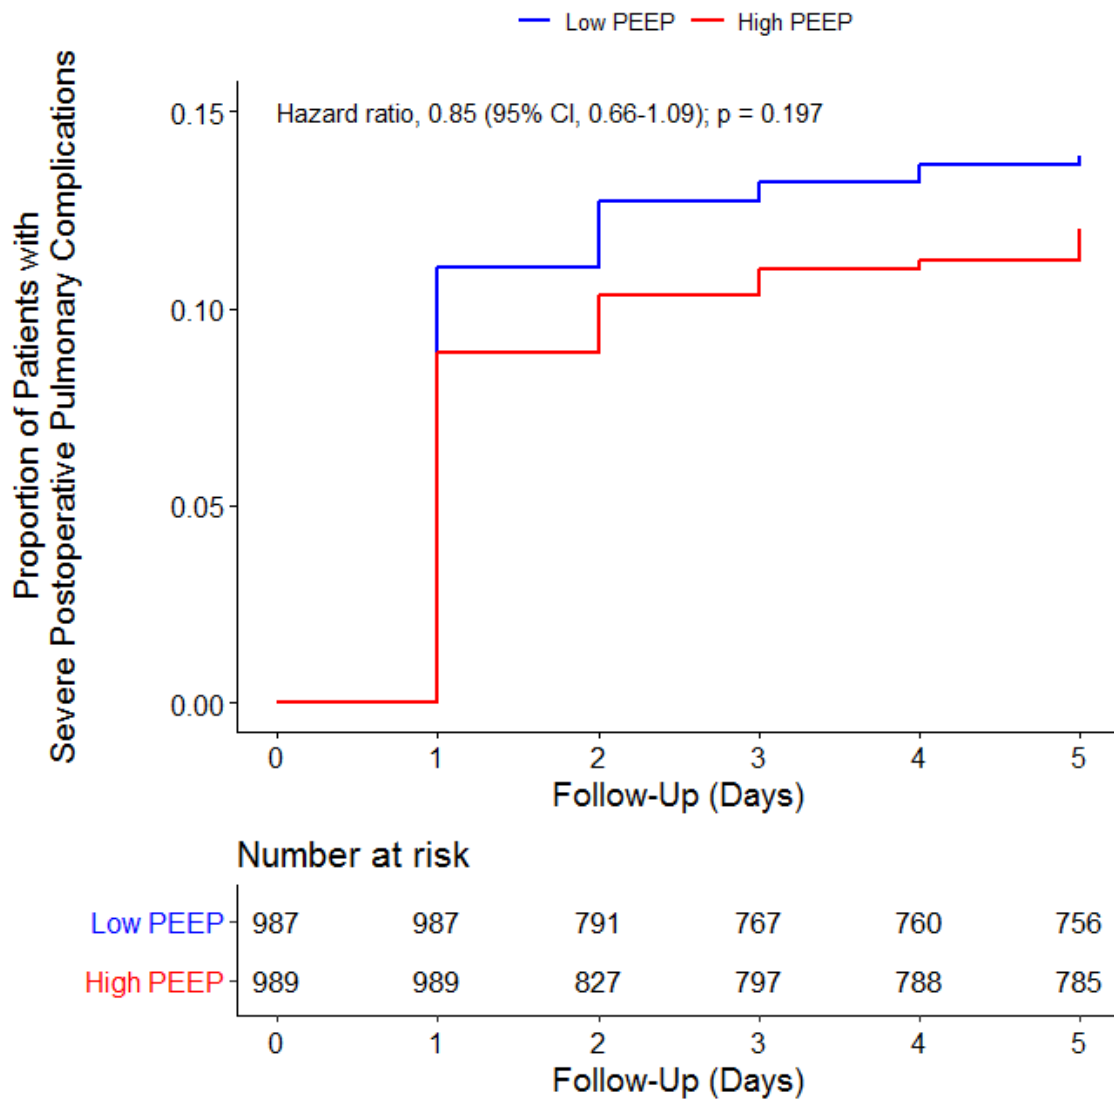

With a median follow-up of 4 (2 – 5) days, the rate of severe postoperative pulmonary complications within the first 5 postoperative days was 11.7% in the high positive end-expiratory pressure (PEEP) group and 13.6% in the low PEEP group (hazard ratio for severe postoperative pulmonary complications, 0.85; 95% confidence interval 0.66 to 1.09; P=0.197). P value for the Schoenfeld residuals was 0.28.

**Figure 10. Probability of postoperative extra-pulmonary complications in the first 5 postoperative days**

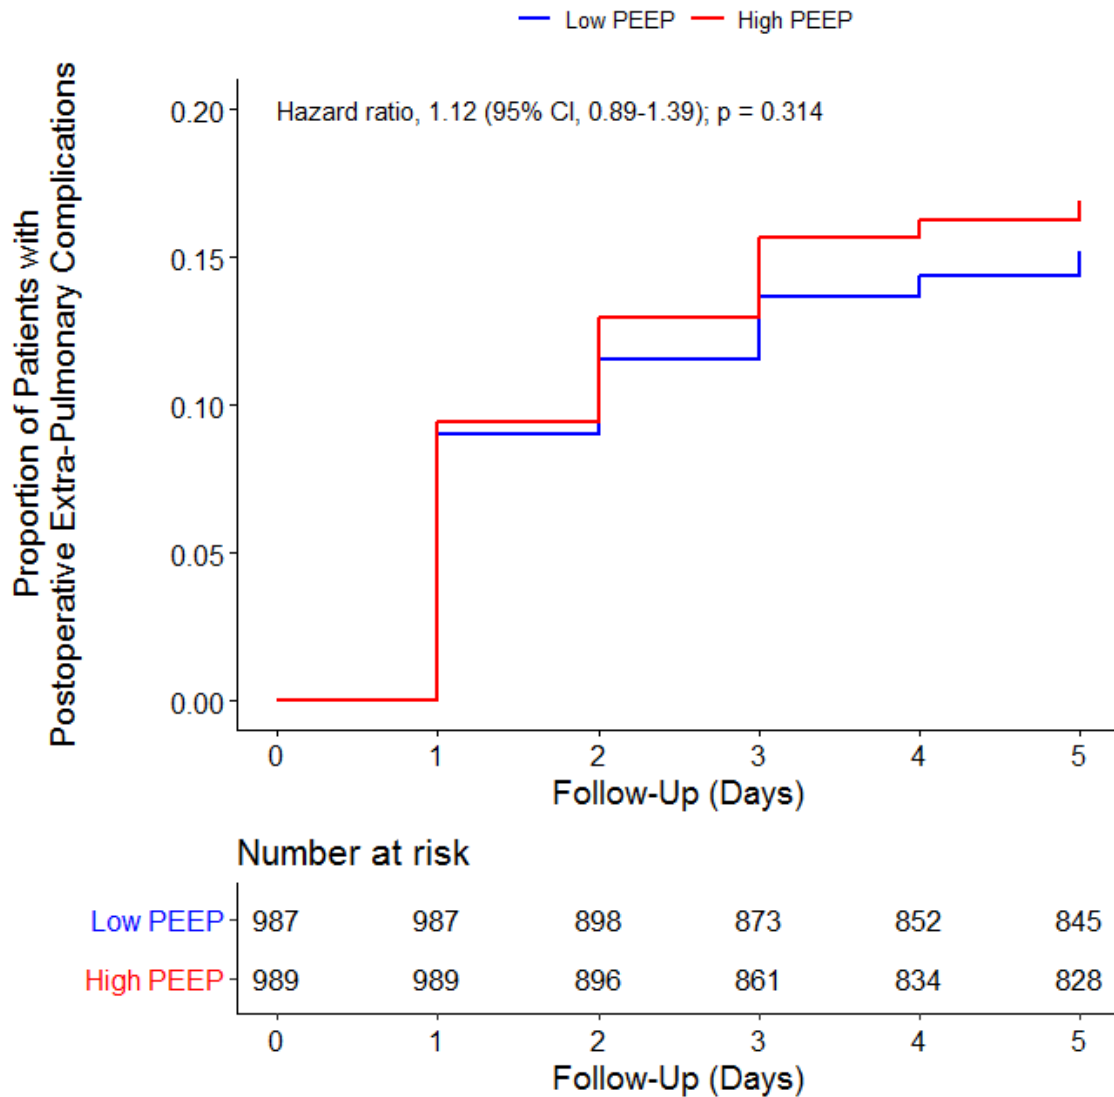

With a median follow-up of 4 (2 – 5) days, the rate of postoperative extra-pulmonary complications within the first 5 postoperative days was 16.9% in the high positive end-expiratory pressure (PEEP) group and 15.2% in the low PEEP group (hazard ratio for postoperative extra-pulmonary complications, 1.12; 95% confidence interval 0.89 to 1.39; P=0.314). P value for the Schoenfeld residuals was 0.67.



**eFigure 11. Probability of death in the first 5 postoperative days**

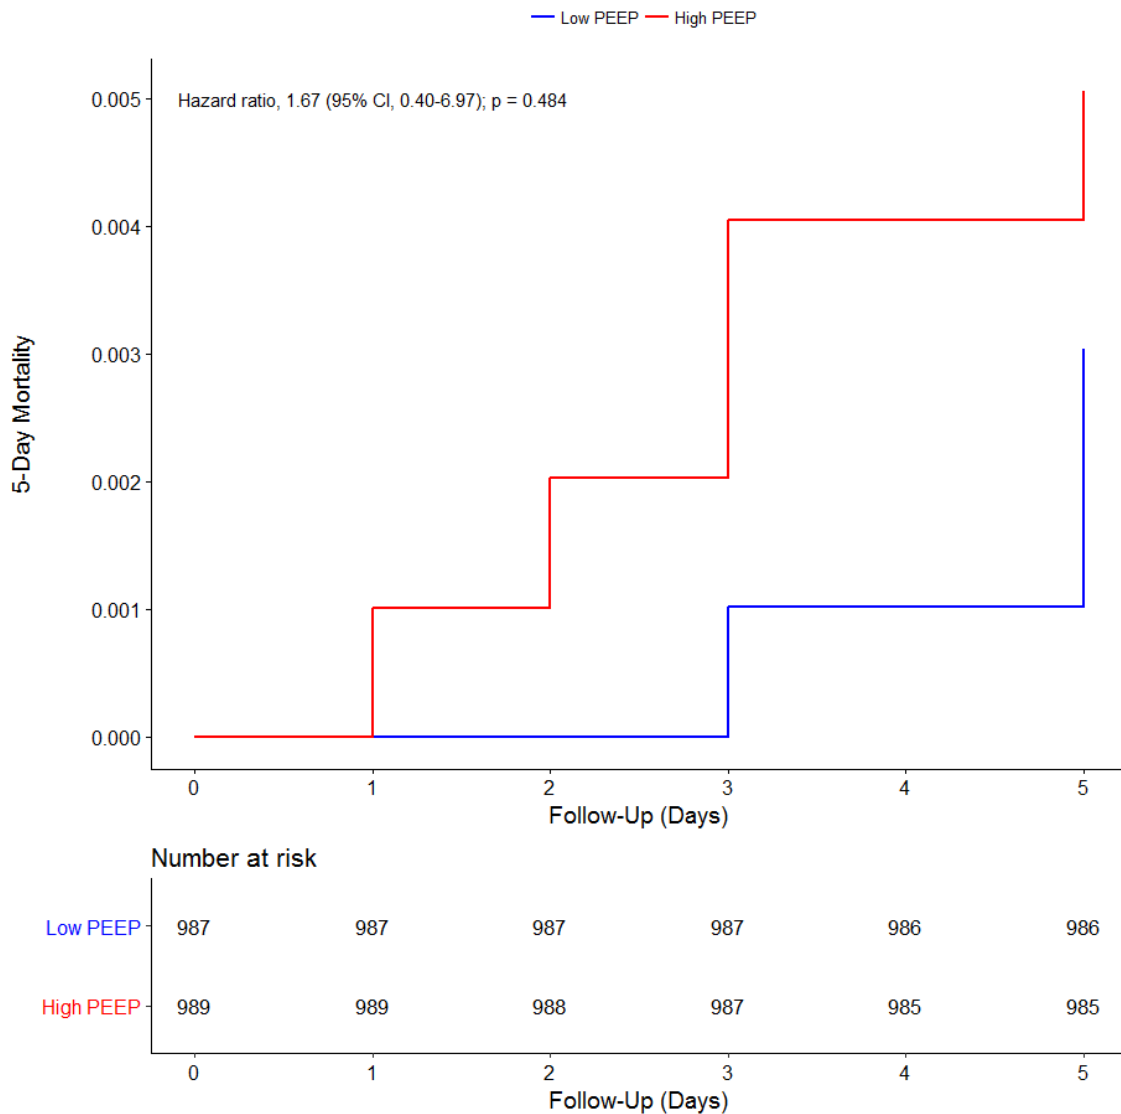

With a median follow-up of 4 (2 – 5) days, the rate of postoperative extra-pulmonary complications within the first 5 postoperative days was 0.5% in the high positive end-expiratory pressure (PEEP) group and 0.3% in the low PEEP group (hazard ratio for 5-day mortality, 1.67; 95% confidence interval 0.40 to 6.97; P=0.484). P value for the Schoenfeld residuals was 0.14.

**eFigure 12. Results of the sensitivity analysis for the primary endpoint**

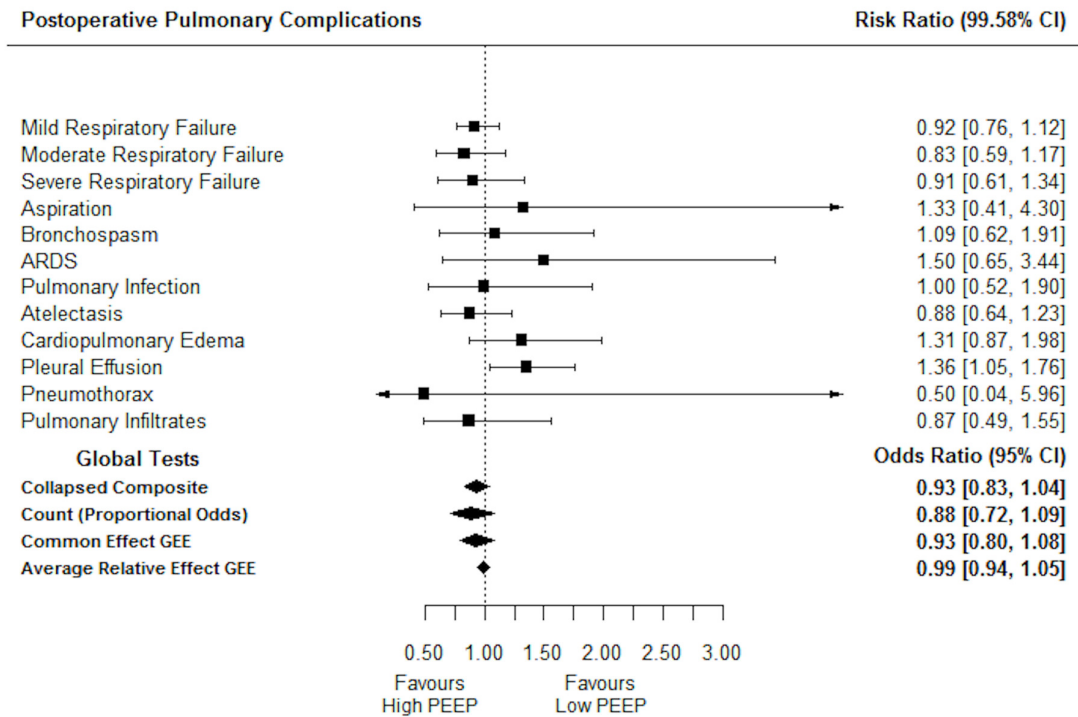

CI, confidence interval; ARDS, acute respiratory distress syndrome; GEE, generalized estimating equations; PEEP, positive end-expiratory pressure.

## eReferences

1. Canet J, Gallart L, Gomar C, et al. Prediction of postoperative pulmonary complications in a population-based surgical cohort. *Anesthesiology* 2010;113:1338-50.
2. Force ADT, Ranieri VM, Rubenfeld GD, et al. Acute respiratory distress syndrome: the Berlin Definition. *JAMA* 2012;307:2526-33.
3. Morrison LJ, Deakin CD, Morley PT, et al. Part 8: Advanced life support: 2010 International Consensus on Cardiopulmonary Resuscitation and Emergency Cardiovascular Care Science With Treatment Recommendations. *Circulation* 2010;122:S345-421.
4. Levy MM, Fink MP, Marshall JC, et al. 2001 SCCM/ESICM/ACCP/ATS/SIS International Sepsis Definitions Conference. *Intensive Care Med* 2003;29:530-8.
5. Thygesen K, Alpert JS, White HD, et al. Universal definition of myocardial infarction. *Circulation* 2007;116:2634-53.
6. Bellomo R, Ronco C, Kellum JA, Mehta RL, Palevsky P, Acute Dialysis Quality Initiative w. Acute renal failure - definition, outcome measures, animal models, fluid therapy and information technology needs: the Second International Consensus Conference of the Acute Dialysis Quality Initiative (ADQI) Group. *Crit Care* 2004;8:R204-12.
7. Levi M, Toh CH, Thachil J, Watson HG. Guidelines for the diagnosis and management of disseminated intravascular coagulation. *British Committee for Standards in Haematology. British journal of haematology* 2009;145:24-33.
8. Reintam A, Parm P, Kitus R, Starkopf J, Kern H. Gastrointestinal failure score in critically ill patients: a prospective observational study. *Crit Care* 2008;12:R90.
9. Du ZG, Wei YG, Chen KF, Li B. An accurate predictor of liver failure and death after hepatectomy: a single institution's experience with 478 consecutive cases. *World journal of gastroenterology* 2014;20:274-81.
10. Wlodzimirow KA, Eslami S, Abu-Hanna A, Nieuwoudt M, Chamuleau RA. Systematic review: acute liver failure - one disease, more than 40 definitions. *Alimentary pharmacology & therapeutics* 2012;35:1245-56.
