# Supplementary material
Source: PubMed Central journal article supplement (PMC6582260)
Supplement: jama-321-2292-s005.pdf [file jama-321-2292-s005.pdf]

## Data Sharing Statement

Bluth. Effect of Intraoperative High Positive End-Expiratory Pressure (PEEP) With Recruitment Maneuvers vs Low PEEP on Postoperative Pulmonary Complications in Obese Patients. *JAMA*. Published June 03, 2019. 10.1001/jama.2019.7505

### Data

**Data available:** Yes

**Data types:** Deidentified participant data, Data dictionary

**How to access data:** Data will be made available upon approval of formal request at the study's steering committee. The request shall be sent to to Dr. Marcelo Gama de Abreu, email-address mgabreu@uniklinikum-dresden.de

**When available:** With publication

### Supporting Documents

**Document types:** Statistical/analytic code

**How to access documents:** The request for the analytic code shall be sent to to Dr. Marcelo Gama de Abreu, email-address probese@peg-dresden.de.

**When available:** With publication

### Additional Information

**Who can access the data:** Researchers who provide a methodologically sound proposal to achieve aims in the approved proposal

**Types of analyses:** Specified purposes only

**Mechanisms of data availability:** With signed data access agreement.

**Any additional restrictions:** N/A.
